## **Air pollution, SARS-CoV-2 transmission, and COVID-19 outcomes: A state-of-the-science review of a rapidly evolving research area**

Bhaskar A<sup>1†</sup>, Chandra J<sup>1†</sup>, Braun D<sup>2,3</sup>, Cellini J<sup>4</sup>, Dominici F<sup>2\*</sup>

†Authors contributed equally to this work

\*Corresponding Author: [fdominic@hsph.harvard.edu](mailto:fdominic@hsph.harvard.edu)

<sup>1</sup>Harvard College, Harvard University, Boston, MA

<sup>2</sup>Department of Biostatistics, Harvard T. H. Chan School of Public Health, Boston, MA

<sup>3</sup>Department of Data Sciences, Dana-Farber Cancer Institute, Boston, MA

<sup>4</sup>Countway Library, Harvard Medical School, Harvard University, Boston, MA

## **Abstract**

### **Background:**

As the coronavirus pandemic rages on, 692,000 (August 7, 2020) human lives and counting have been lost worldwide to COVID-19. Understanding the relationship between short- and long-term exposure to air pollution and adverse COVID-19 health outcomes is crucial for developing solutions to this global crisis.

### **Objectives:**

To conduct a scoping review of epidemiologic research on the link between short- and long-term exposure to air pollution and COVID-19 health outcomes.

### **Method:**

We searched PubMed, Web of Science, Embase, Cochrane, MedRxiv, and BioRxiv for preliminary epidemiological studies of the association between air pollution and COVID-19 health outcomes. 28 papers were finally selected after applying our inclusion/exclusion criteria; we categorized these studies as long-term studies, short-term time-series studies, or short-term cross-sectional studies. One study included both short-term time-series and a cross-sectional study design.

### **Results:**

27 studies of the 28 reported evidence of statistically significant positive associations between air pollutant exposure and adverse COVID-19 health outcomes; 11 of 12 long-term studies and all 16 short-term studies reported statistically significant positive associations. The 28 identified studies included various confounders, spatial and temporal resolutions of pollution concentrations, and COVID-19 health outcomes.

### **Discussion:**

We discuss methodological challenges and highlight additional research areas based on our findings. Challenges include data quality issues, ecological study design limitations, improved adjustment for confounders, exposure errors related to spatial resolution, geographic variability

in testing, mitigation measures and pandemic stage, clustering of health outcomes, and a lack of publicly available data and code.

## Introduction

The COVID-19 pandemic is devastating human health in a manner unseen since the last century. As the pandemic rages on, as of August 7, 2020, the world faces a total of 7.94M confirmed cases and the loss of 692,000 human lives and counting (Wikipedia 2020). The death toll in the United States continues to rise and has even surpassed the US death toll during World War II (Johns Hopkins University and Medicine).

An enormous amount of scientific literature has provided strong evidence that short- and long-term exposure to air pollution leads to an increased risk of mortality and morbidity (US Environmental Protection Agency 2020). Air pollution contributes to respiratory tract infections, chronic obstructive pulmonary disease, coronary heart disease, and diabetes burden, in addition to other chronic conditions (Jiang et al. 2016; Lelieveld and Munzel 2019; US Environmental Protection Agency 2020). A review of evidence supports a relationship between high concentrations of air pollution and the probability of respiratory viruses negatively impacting the respiratory system and exacerbating disease severity (Domingo and Rovira 2020). These health risks are compounded by recent evidence that SARS-CoV-2 can exist on particulate matter, suggesting that air pollution can contribute to viral spread (Setti et al. 2020).

Exposure to air pollutants has been shown to adversely impact respiratory health by inducing oxidative stress, damaging macrophage cells, decreasing the expression of surfactant proteins, and increasing the permeability of lung epithelial cells, all of which can reduce resistance to viral infection (Ciencewicki and Jaspers 2007). In studying outbreaks of SARS, the first human coronavirus, Cui et al. (2003) provided preliminary evidence of a positive association between air pollution and case fatality, although their ecological study did not adjust for confounders. Severe COVID-19 infection is characterized by a high inflammatory burden, and it can cause viral pneumonia with additional extrapulmonary manifestations and complications including

acute respiratory distress syndrome (ARDS) (Chen et al. 2020; Huang et al. 2020; Mehta et al. 2020; Ruan et al. 2020; Wang D et al. 2020; Xu Z et al. 2020), which has a mortality rate ranging from 27% to 45% (Diamond et al. 2020). A recent study by our group documented a statistically significant association between long-term exposures to fine particulate matter (PM<sub>2.5</sub>) and ozone and the risk of ARDS among older adults in the United States (Rhee et al. 2019).

To support the scientific community in their work to mitigate risk and develop solutions to address the global COVID-19 crisis, it is crucial to evaluate the evidence to date on the potential associations between exposure to air pollution and COVID-19 health outcomes. Previous reviews of this literature (Benmarhnia 2020; Copat et al. 2020) were limited in scope. This review is unique in its inclusion of both short- and long-term exposure studies as well as a specific focus on identifying unresolved methodological challenges to understanding the association between exposure to air pollution and COVID-19 health outcomes. By chronicling the use of relevant confounders, air pollution datasets, and statistical approaches, we also highlight future opportunities for research on the intersection between air pollution exposure and COVID-19 health outcomes.

## **Methods**

**Protocols:** We conducted this state-of-the science review based on the 5-step process (identification of the research question, identification of relevant studies, selection of studies to include based on inclusion/exclusion criteria, charting of the data, summarization results) outlined by Arksey and O'Malley (Arksey and O'Malley 2005).

**Search strategy:** We conducted a literature search of the National Library of Medicine's PubMed database (National Institutes of Health et al.), Elsevier's Embase Database, Clarivate

Analytics Web of Science Database, Cochrane's COVID-19 Study Register, Cold Spring Harbor Laboratory's medRxiv, and Cold Spring Harbor Laboratory's bioRxiv. The final search date was June 9, 2020. "Air pollution" and "COVID-19" were used as the keywords for the searches, along with their synonyms, including "PM2.5," "PM10," "particulate," "NO2," "ozone," "O3," etc., for air pollution, and "coronavirus," "SARS-CoV-2," "SARSCov19," etc., for COVID-19. The full search queries used for each database are provided in Supplemental Materials Table 1.

**Study eligibility criteria and study selection:** Inclusion/exclusion criteria were designed to identify original research describing the effects of air pollution on COVID-19 health outcomes (Figure 1). We included both published and preprint studies due to the quickly evolving nature of the topic. Only studies published in English up until June 9, 2020 were included.

Two screeners (AB and JC) reviewed each identified paper from the database searches in the Covidence online platform. Duplicate papers were removed. The studies were then put through a coarse-grain selection process in which studies were excluded based on a review of the title and abstract. Papers that did not discuss air pollution and COVID-19 health outcomes were excluded. In the second round, full texts were reviewed. Studies that discussed the effects of short- or long-term exposure to air pollution on COVID-19 health outcomes were included. Studies could report various COVID-19 health outcomes, including case incidence, case-fatality rate, mortality rate, case hospitalizations, death rate, and secondary cases produced by an initially infected individual. Studies were neither restricted based on the temporal and spatial resolution of air pollution data or the COVID-19 health data nor on the basis of confounder selections.

Any studies investigating the effects of COVID-19 and the lockdowns caused by COVID-19 on air pollution were excluded as these studies are not the focus of this specific review. Many early

studies described the relationship between COVID-19 cases and air pollution without significant quantitative or statistical analysis. These studies concluded that air pollution is related to coronavirus spread because early cases in the pandemic were concentrated in the highly polluted Po Valley and other highly polluted areas of China (Frontera et al. 2020; Martelletti and Martelletti 2020). These studies, which provided only cursory analyses, were also excluded.

**Data extraction:** For each selected study, we extracted information about the title, author, and which journal/preprint repository it was housed in, as well as geographical area of study, research question, health outcome, exposure, statistical methods, results, covariates or possible confounders, and code availability.

**Study quality:** One study did not describe the statistical methods used but still reported a significant p-value (Baron et al. 2020) and another study used an unspecified air quality metric (Bashir et al. 2020).

## Results

### *Selected studies*

The search yielded 825 articles across all of the databases (Figure 1). After excluding studies that did not discuss both air pollution and COVID-19, 80 articles were eligible for full text review. Of these, only 28 were full studies published in English that investigated the effects of air pollution on COVID-19 health outcomes. Only 3 of the 28 articles included open access of their code.

Tables 1-3 present a summary of the 28 selected articles. Table 1 summarizes cross-sectional studies that focus on the long-term effects of air pollution on COVID-19 health outcomes (n=12 studies) (Andree 2020; Coccia 2020; Fattorini and Regoli 2020; Liang et al. 2020; Lippi et al.

2020; Ogen 2020; Pansini and Fornacca 2020a, b; Tian H et al. 2020; Tian T et al. 2020; Travaglio et al. 2020; Wu et al. 2020). These studies examined the impact of air pollution exposure over a long period of time prior to the SARS-CoV-2 outbreak. The underlying hypotheses of these studies is that exposure to air pollution over long periods of time negatively impacts respiratory health, thereby increasing the susceptibility to SARS-CoV-2 infection and more severe COVID-19 health outcomes. All of these studies relied on a cross-sectional study design.

Table 2 summarizes time-series studies that focus on the short-term effects of air pollution on COVID-19 health outcomes (n=9 studies) (Bashir et al. 2020; Han et al. 2020; Jiang et al. 2020; Li et al. 2020; Wang B et al. 2020; Xu H et al. 2020; Yao et al. 2020a, b; Zhu et al. 2020). These studies compared day-to-day variations in air pollution with day-to-day variations in COVID-19 health outcomes. Table 3 summarizes cross-sectional studies that focus on the short-term effects of air pollution on COVID-19 health outcomes (n=8 studies) (Baron 2020; Frontera et al. 2020; Fronza et al. 2020; Setti et al. 2020; Yao et al. 2020a; Yao et al. 2020c; Zhang T et al. 2020; Zhou et al. 2020). These studies compared air pollution levels during the outbreak or shortly before the outbreak with COVID-19 health outcomes. The underlying hypothesis of both time-series and cross-sectional studies is that short-term air pollution exposure increases the transmission of the virus or the severity of COVID-19.

Note that one of the 28 studies included both short-term time-series and short-term cross-sectional study designs (Yao et al. 2020a); this study is included in both Tables 2 and 3.

### ***Source of the studies***



Of the 12 long-term studies, 11 were published in MedRxiv and 1 was published in a peer-reviewed journal. Of the 16 short-term studies, 10 were published in MedRxiv and 6 were published in a peer-reviewed journal.

### ***Location of the studies***

The 28 studies examined the effects of air pollution on COVID-19 health outcomes across 9 different countries (China, Italy, USA, France, Iran, Spain, Germany, United Kingdom, and the Netherlands). Many of the studies focused on cities and provinces in China, regions and provinces in Italy, and counties in the United States, all regions where the SARS-CoV-2 outbreak occurred early and was prominent. Among the short-term studies, 12 were conducted in China, 3 in Italy, 1 in the United States, 1 in France, 1 in Germany, and 1 in Spain. Among the long-term studies, 6 were conducted in Italy, 5 in the United States, 3 in China, 2 in Spain, 2 in France, 2 in Germany, 2 in the United Kingdom, 1 in Iran, and 1 in the Netherlands.

### ***COVID-19 health outcomes and exposures***

5 different COVID-19 health outcomes were included across the 12 long-term studies and 7 different COVID-19 health outcomes were included across the 16 short-term studies. Among the 12 long-term studies, 8 used number of cases, 7 used number of deaths, 1 used case-hospitalizations, 1 used case-fatality rate, and 1 used percent of severe infection. Among the 16 short-term studies, 12 used number of cases, 3 used number of deaths, 2 used case-fatality rate, 2 used basic reproduction number, 1 used ICU admissions, 1 used hospitalized cases, and 1 used a binary variable for epidemic escalation.

The 28 studies also used a variety of air pollution exposures. 11 of the 12 long-term studies collected air pollution data over extended periods of time ranging from 1 to 16 years. These studies used data after 1999 and prior to 2020. One study that self-classified as long-term

collected air pollution data from January and February 2020 (Ogen 2020). While this study included air pollution data prior to the outbreak, it does not fully represent long-term exposure, as the data were collected over a period of only 2 months. Ten of the long-term studies obtained air pollution concentrations or air quality index values, and 3 studies used the number of daily limit exceedances.

The short-term time series studies used daily air pollution data collected over relatively shorter periods of time, ranging from 17 days to 80 days. These studies used daily air pollution data during the outbreak with a short lag time to account for incubation period and/or time from exposure to death. However, Bashir et al. (2020) did not discuss the use of a lag period in their analyses, which should be taken into consideration when interpreting the results from that study. Eight of the short-term time-series studies used air pollutant concentrations or air quality index values, and one study used an unspecified air quality metric provided by the National Weather Service (Bashir et al. 2020).

Short-term cross-sectional studies used aggregated air pollution data collected before or during the outbreak. These studies collected air pollution data over periods of time ranging from 1 to 3 months. One of the short-term cross-sectional studies collected air pollution concentration data based on the number of daily limit exceedances over a period of time (Setti et al. 2020). The other 7 studies used air pollutant concentrations or air quality index values.

Overall, 21 studies examined PM<sub>2.5</sub> (9 long-term, 12 short-term); 16 studied PM<sub>10</sub> (7 long-term, 9 short-term); 14 studied NO<sub>2</sub> (7 long-term, 7 short-term); 12 studied O<sub>3</sub> (8 long-term, 4 short-term); 7 studied CO (3 long-term, 4 short-term); and 7 studied SO<sub>2</sub> (4 long-term, 3 short-term). Two short-term studies examined Air Quality Index (AQI), 1 long-term study examined NO, 1 long-term study examined aerosols, 1 long-term study examined HCHO, 1 short-term study

looked at NH<sub>3</sub>, and 1 short-term study included an unspecified air quality metric provided by the National Weather Service.

### ***Covariates and Confounders***

5 of the 12 long-term studies (Table 1) did not consider covariates and confounders in their analyses. 3 of the 9 short-term time-series studies (Table 2) and 3 of the 8 short-term cross-sectional studies (Table 3) did not consider covariates and confounders in their analyses.

### ***Statistical models***

There were 8 different statistical models used across the 12 long-term studies and 9 different statistical models used across the 16 short-term studies. Among the 12 long-term studies, 3 used linear regression, 2 used negative binomial regression, 2 used negative binomial mixed models, 2 used rank correlation, 1 used descriptive analyses, 1 used non-parametric penalized linear regression, 1 used Poisson regression, and 1 used Partitioning Around the Medoids Clustering Algorithm. Among the 16 short-term studies, 8 used linear regression, 2 used Poisson regression, 2 used rank correlation, 1 used binomial regression, 1 used unspecified analyses, 1 used artificial neural networks (ANN), 1 used negative binomial regression, 1 used a generalized additive model with a Gaussian distribution, and 1 used a generalized additive model with a quasi-Poisson distribution.

### ***Statistically significant results***

Of the 28 studies, 27 showed a statistically significant positive association between air pollution and adverse COVID-19 health outcomes (Figure 2). The only long-term study that did not show a statistically significant association conducted a descriptive analysis of NO<sub>2</sub> and COVID-19 health deaths (Ogen 2020). All of the 16 short-term studies found statistically significant positive associations between air pollution and adverse COVID-19 outcomes. While 27 of the 28 papers

found a statistically significant positive association between an air pollutant and adverse COVID-19 health outcomes, not every air pollutant studied was found to be statistically significant or positively associated with every adverse COVID-19 health outcome studied in every location studied for every lag period analyzed.

Among the long-term studies, those that found a statistically significant positive association between a specific air pollutant and adverse COVID-19 health outcomes are as follows: 8 of 9 studies of PM<sub>2.5</sub>; 5 of 8 studies of O<sub>3</sub>; 6 of 7 studies of NO<sub>2</sub>; 6 of 7 studies of PM<sub>10</sub>; 1 of 4 studies of SO<sub>2</sub>; and 2 of 3 studies of CO. The only long-term studies that included HCHO and NO found a statistically significant positive association. The only long-term study of aerosols did not find a statistically significant positive association.

Among the short-term studies, those that found a statistically significant positive association between a specific air pollutant and adverse COVID-19 health outcomes are as follows: all 12 studies of PM<sub>2.5</sub>; 8 of 9 studies of PM<sub>10</sub>; 5 of 7 studies of NO<sub>2</sub>; 3 of 4 studies of O<sub>3</sub>; and 3 of 4 studies of CO. Of the 3 short-term studies of SO<sub>2</sub>, none found a statistically significant positive association with adverse COVID-19 health outcomes, whereas both of the 2 short-term papers studying AQI found a statistically significant positive association. The only papers studying NH<sub>3</sub> and an unspecified air quality metric provided by the National Weather Service also found statistically significant positive associations with adverse COVID-19 health outcomes.

## **Discussion**

We searched the literature from January 1, 2020 to June 9, 2020 to identify studies that examined the relationship between air pollution and adverse COVID-19 health outcomes. The query yielded papers published in 2020, and 28 papers satisfied our exclusion/inclusion criteria. These papers used different statistical models, different datasets, and different confounders.

Nonetheless, 27 of the 28 included studies reported some form of statistically significant association between exposure to air pollution and adverse COVID-19 health outcomes.

While researchers want to disseminate their results rapidly to accelerate knowledge about this pandemic as it unfolds, this practice presented us with many challenges when trying to understand the results of the selected studies and their implications. Yet, even in pre-pandemic times, research on the health effects of air pollution is challenging. It is well known that assessing causality in air pollution epidemiology is complicated by the fact that most studies are observational with a large number of confounding factors (Dominici and Zigler 2017). There is also the consistent threat of unmeasured confounding bias. Exposure and outcome misclassification present further challenges.

When the goal is to determine a clear association between air pollution and its effects on health outcomes, such as adverse COVID-19 health outcomes, some well-known challenges become even more serious, and a number of additional complications emerge. These additional challenges are mostly related to the reality that the data on SARS-CoV-2 and COVID-19 are constantly evolving, come from a variety of sources, and are primarily available only at the aggregate level (e.g., county, regional, or country level). Indeed, the quality of the data and the lack of available well-validated electronic health record data at the national level (particularly in the United States) renders the general challenges in evaluating causality enumerated above even more difficult to address. We summarize below the most important methodological challenges, which in turn highlight critically important areas of research that will need to be pursued.

**Data quality:** The validity of the health outcome data are questionable, as there is no uniform case definition of a COVID-19 death and there are also diagnostic errors in COVID-19 cases

(Gandhi and Singh 2020). This could potentially contribute to a high degree of over- or under-reporting. Many infected people may have died without ever having been tested for SARS-CoV-2, while in other cases, SARS-CoV-2 might have been secondary to the cause of an individual's death. Moreover, in the early phases of the SARS-CoV-2 pandemic, and even in the current phase of the pandemic, testing was not universally available due to shortages in test kits and the relatively late adoption of mass-scale testing. Additionally, only a subset of the population has been tested, and we cannot account for those who are asymptomatic but carry the virus.

**Ecological fallacy:** 27 of the 28 studies included were ecological studies as opposed to individual-level studies. The only study conducted at the individual level was conducted by a group in England, where links between air pollution and adverse COVID-19 health outcomes were studied by looking at patient health records (Travaglio et al. 2020). Ecological fallacy is a formal fallacy in the interpretation of statistical data that occurs when inferences about the nature of individuals are deduced from inferences about the group to which those individuals belong (see for example (Jackson et al. 2008)). While ecological studies are often very useful at generating preliminary evidence in data-scarce settings, increasing the scientific rigor of research in this area requires access to nationally representative, individual-level data on adverse COVID-19 health outcomes, including information about patients' residential address, demographics, and individual-level confounders. This is an enormous challenge that will require many privacy, legal, and ethical trade-offs (Sittig and Singh 2020).

**Other determinants of COVID-19:** Ecological data typically do not allow for adjustment by individual risk factors such as age, gender, ethnicity, or occupation. Age is one of the strongest predictors of survival for most conditions, including COVID-19. Gender-based differences in time-activity patterns contribute to different levels of air pollution exposure between men and women, and women have been shown to be more susceptible to several environmental

exposures (Clougherty 2010). Occupation is also an important factor in this pandemic, as those who provide medical care and other essential workers, such as those working in meat packing plants, are at increased risk of developing SARS-CoV-2 infection (Mutambudzi et al. 2020).

**Accounting for difference and socioeconomic status:** It is also important to recognize that disadvantaged people (e.g., those without health insurance, undernourished, and with poorly managed underlying health conditions, such as cardiovascular conditions and/or diabetes) have a greater susceptibility for both contracting SARS-CoV-2 and dying from COVID-19. Myriad social and economic factors contribute to high rates of infection and put individuals at higher risk from the sequelae of COVID-19, and disparities in COVID-19–related outcomes may be due to social deprivation rooted in long-standing racial and socio-economic inequities. This issue has been raised by a number of authors (see for example (Chowkwanyun and Reed 2020; Yancy 2020)).

**Exposure error:** In most of the studies reviewed, both long-term and short-term, the same level of air pollution exposure was assigned to everyone living in large geographical areas. Therefore, spatial differences in exposure were not captured. Several statistical approaches have been developed to propagate the different sources of uncertainty associated with exposure error into the statistical model to estimate health effects (see for example (Dominici et al. 2000; Gryparis et al. 2009; Szpiro et al. 2011)). These approaches have not yet been implemented in studies of air pollution exposure and adverse COVID-19 health outcomes.

**Physical distancing:** The implementation of public health policies, which can vary widely by jurisdiction, has been shown to be successful in reducing SARS-CoV-2 transmission and flattening the epidemic curve. For example, in Georgia, areas that did not adopt physical distancing practices experienced higher incidence and mortality from COVID-19 when

compared to other areas in the state that did. Cities in California that tend to have higher levels of fine particulate matter adopted stay-at-home policies earlier than other regions. Because these policies differ by regional air pollution levels, including rural and urban areas within the same county, they can distort the observed associations between air pollution and adverse COVID-19 health outcomes.

**Timing on the epidemic curve:** There will be temporal differences in the number of incident COVID-19 cases, and by extension in COVID-19–related deaths, by region. US counties were at very different stages on the epidemic curves, especially in early April. Larger cities are more populous and tend to have increased travel to and from international locations, providing increased opportunity for the spread of COVID-19 early in the pandemic. These larger cities also tend to have higher concentrations of air pollution. The practical implications are that there will be a greater number of incident cases and deaths in those cities that are further along on the epidemic curve, which further confounds analysis.

**Clustering of cases and deaths:** Unlike studies of long-term exposure to air pollution and chronic diseases where deaths can reasonably be assumed to be independent, COVID-19 cases and deaths tend to occur in clusters. This has been widely reported, such as the now famous choir practice where a large portion of attendees became ill or the tragic events in congregant settings such as retirement homes and long-term care facilities. Although some of the studies' authors included random effects to account for clustering, without individual-level data, it is simply not possible to account for this clustering.

**Reproducibility:** To discover crucial linkages between air pollution and adverse COVID-19 outcomes in a more definitive, causal manner, both the data used for the analyses as well as the code should be made publicly available. Transparency and shared resources will assist in



the global push towards uncovering the solutions to the pandemic and instituting public policies that will protect the health of people worldwide. Only two of the 28 selected papers included publicly-available code. Many of the selected papers were in preprint format, and access to code will be critical to validate results and build upon the conclusions. It is difficult to reproduce results and continue work on these areas without code availability.

## **Conclusion**

Assessing the short- and long-term effects of air pollution on adverse COVID-19 health outcomes is a rapidly evolving area of research. Most of these studies are still in the preprint stage and many more studies will likely be published in the next few weeks and months. Therefore, our aim was to identify this topic as a critically important area of research, identify the numerous methodological challenges, and inform future research. Despite the preliminary nature of the evidence summarized in this scoping review, our findings underscore the need to hold governments accountable for the installation of environmental protections that will permanently maintain safe levels of air pollution to protect human health, rather than removing those environmental protections at the behest of the industries that pollute our environment. In the era of climate change, and now global pandemics, studies like these are among many calling for action to protect the earth systems that are so deeply intertwined with human systems, particularly systems of human health.

A primary goal of this scoping review was to begin paving the way toward overcoming the many methodological challenges that are inherent in studies of environmental health epidemiology. Some of these challenges are common to all epidemiological studies of air pollution and health outcomes (e.g., exposure error, measured and unmeasured bias), while others are exacerbated in the study of adverse COVID-19 health outcomes (e.g., outcome misclassification, evolving

number of new cases and deaths) and global pandemics (e.g., accounting for different testing practices, different stages of the pandemic).

With respect to these new challenges, it is just as important to highlight new opportunities. For example, the extreme measures implemented during the lockdown are providing new research opportunities to investigate important questions regarding achievable reductions in air pollution exposure and health effects. Indeed, in order to mitigate the effects of the pandemic and to protect lives, countries across the globe instituted temporary, and in many cases, continued closures of all but essential businesses and services, instituting lockdowns to encourage people to stay at home and prevent the spread of disease. This has resulted in significantly lower levels of vehicular, train, aircraft, and industry related emissions (Le Quéré et al. 2020; Shilling and Waetjen 2020; Zhang R et al. 2020). These lockdown measures provide a unique opportunity to exploit the features of a quasi-experimental design to assess the extent to which different pollutants have declined and estimate the potential “beneficial” effects of these declines on health outcomes.

### **Acknowledgements**

We gratefully acknowledge support from the 2020 Star-Friedman Challenge for Promising Scientific Research which supported Dr. Dominici and Dr. Braun.

### **References**

Andree BPJ. 2020. Incidence of COVID-19 and Connections with Air Pollution Exposure: Evidence from the Netherlands. medRxiv:2020.2004.2027.20081562, 10.1101/2020.04.27.20081562

- Arksey H, O'Malley L. 2005. Scoping studies: towards a methodological framework. *International Journal of Social Research Methodology* 8:19-32, 10.1080/1364557032000119616
- Baron YM. 2020. Covid-19 Pandemic in relation to levels of Pollution with PM2.5 and Ambient Salinity. An Environmental Wake-up Call. medRxiv:2020.2005.2003.20087056, 10.1101/2020.05.03.20087056
- Bashir MF, Ma B, Bilal, Komal B, Bashir MA, Tan D, et al. 2020. Correlation between climate indicators and COVID-19 pandemic in New York, USA. *Science of The Total Environment* 728:138835, <https://doi.org/10.1016/j.scitotenv.2020.138835>
- Benmarhnia T. 2020. Linkages Between Air Pollution and the Health Burden from COVID-19: Methodological Challenges and Opportunities. *American Journal of Epidemiology*, 10.1093/aje/kwaa148
- Chen L, Liu HG, Liu W, Liu J, Liu K, Shang J, et al. 2020. [Analysis of clinical features of 29 patients with 2019 novel coronavirus pneumonia]. *Zhonghua Jie He He Hu Xi Za Zhi* 43:E005, 10.3760/cma.j.issn.1001-0939.2020.0005
- Chowkwanyun M, Reed AL. 2020. Racial Health Disparities and Covid-19 — Caution and Context. *New England Journal of Medicine* 383:201-203, 10.1056/NEJMp2012910
- Ciencewicki J, Jaspers I. 2007. Air Pollution and Respiratory Viral Infection. *Inhalation Toxicology* 19:1135-1146, 10.1080/08958370701665434
- Clougherty JE. 2010. A growing role for gender analysis in air pollution epidemiology. *Environ Health Perspect* 118:167-176, 10.1289/ehp.0900994
- Coccia M. 2020. Two mechanisms for accelerated diffusion of COVID-19 outbreaks in regions with high intensity of population and polluting industrialization: the air pollution-to-human and human-to-human transmission dynamics. medRxiv:2020.2004.2006.20055657, 10.1101/2020.04.06.20055657

- Copat C, Cristaldi A, Fiore M, Grasso A, Zuccarello P, Oliveri Conti G, et al. 2020. First Review to Explore the Association of Air Pollution (PM and NO<sub>2</sub>) on Severe Acute Respiratory Syndrome Coronavirus (SARS-CoV-2). Preprints:2020050299, 10.20944/preprints202005.0299.v1
- Cui Y, Zhang Z-F, Froines J, Zhao J, Wang H, Yu S-Z, et al. 2003. Air pollution and case fatality of SARS in the People's Republic of China: an ecologic study. *Environmental Health* 2:15, 10.1186/1476-069X-2-15
- Di Q, Amini H, Shi L, Kloog I, Silvern R, Kelly J, et al. 2019. An ensemble-based model of PM<sub>2.5</sub> concentration across the contiguous United States with high spatiotemporal resolution. *Environment International* 130:104909, <https://doi.org/10.1016/j.envint.2019.104909>
- Di Q, Amini H, Shi L, Kloog I, Silvern R, Kelly J, et al. 2020. Assessing NO<sub>2</sub> Concentration and Model Uncertainty with High Spatiotemporal Resolution across the Contiguous United States Using Ensemble Model Averaging. *Environmental science & technology* 54:1372-1384, 10.1021/acs.est.9b03358
- Diamond M, Peniston Feliciano HL, Sanghavi D, Mahapatra S. 2020. Acute Respiratory Distress Syndrome (ARDS). Available: <https://www.ncbi.nlm.nih.gov/books/NBK436002/> [accessed August 3 2020].
- Domingo JL, Rovira J. 2020. Effects of air pollutants on the transmission and severity of respiratory viral infections. *Environmental Research* 187:109650, <https://doi.org/10.1016/j.envres.2020.109650>
- Dominici F, Zeger SL, Samet JM. 2000. A measurement error model for time-series studies of air pollution and mortality. *Biostatistics* 1:157-175, 10.1093/biostatistics/1.2.157
- Dominici F, Zigler C. 2017. Best Practices for Gauging Evidence of Causality in Air Pollution Epidemiology. *Am J Epidemiol* 186:1303-1309, 10.1093/aje/kwx307

- Fattorini D, Regoli F. 2020. Role of the chronic air pollution levels in the Covid-19 outbreak risk in Italy. *Environmental Pollution* 264:114732, <https://doi.org/10.1016/j.envpol.2020.114732>
- Frontera A, Cianfanelli L, Vlachos K, Landoni G, Cremona G. 2020. Severe air pollution links to higher mortality in COVID-19 patients: The “double-hit” hypothesis. *Journal of Infection* 81:255-259, <https://doi.org/10.1016/j.jinf.2020.05.031>
- Fronza R, Lusic M, Schmidt M, Lucic B. 2020. Spatial–Temporal Variations in Atmospheric Factors Contribute to SARS-CoV-2 Outbreak. *Viruses* 12:588, doi: 10.3390/v12060588
- Gandhi TK, Singh H. 2020. Reducing the Risk of Diagnostic Error in the COVID-19 Era. *J Hosp Med* 15:363-366, [10.12788/jhm.3461](https://doi.org/10.12788/jhm.3461)
- Gryparis A, Paciorek CJ, Zeka A, Schwartz J, Coull BA. 2009. Measurement error caused by spatial misalignment in environmental epidemiology. *Biostatistics* 10:258-274, [10.1093/biostatistics/kxn033](https://doi.org/10.1093/biostatistics/kxn033)
- Han Y, Lam JCK, Li VOK, Guo P, Zhang Q, Wang A, et al. 2020. Outdoor Air Pollutant Concentration and COVID-19 Infection in Wuhan, China. [medRxiv:2020.2005.2019.20106484](https://doi.org/10.1101/2020.05.19.20106484), [10.1101/2020.05.19.20106484](https://doi.org/10.1101/2020.05.19.20106484)
- Huang C, Wang Y, Li X, Ren L, Zhao J, Hu Y, et al. 2020. Clinical features of patients infected with 2019 novel coronavirus in Wuhan, China. *Lancet* 395:497-506, [10.1016/S0140-6736\(20\)30183-5](https://doi.org/10.1016/S0140-6736(20)30183-5)
- Jackson C, Best, Nicky, Richardson S. 2008. Hierarchical related regression for combining aggregate and individual data in studies of socio-economic disease risk factors. *Journal of the Royal Statistical Society: Series A (Statistics in Society)* 171:159-178, [10.1111/j.1467-985X.2007.00500.x](https://doi.org/10.1111/j.1467-985X.2007.00500.x)
- Jiang XQ, Mei XD, Feng D. 2016. Air pollution and chronic airway diseases: what should people know and do? *J Thorac Dis* 8:E31-40, [10.3978/j.issn.2072-1439.2015.11.50](https://doi.org/10.3978/j.issn.2072-1439.2015.11.50)

- Jiang Y, Wu XJ, Guan YJ. 2020. Effect of ambient air pollutants and meteorological variables on COVID-19 incidence. *Infection control and hospital epidemiology*:1-5, 10.1017/ice.2020.222
- Johns Hopkins University and Medicine. Coronavirus Resource Center. Available: <https://coronavirus.jhu.edu/> [accessed August 3 2020].
- Le Quéré C, Jackson RB, Jones MW, Smith AJP, Abernethy S, Andrew RM, et al. 2020. Temporary reduction in daily global CO<sub>2</sub> emissions during the COVID-19 forced confinement. *Nature Climate Change* 10:647-653, 10.1038/s41558-020-0797-x
- Lelieveld J, Munzel T. 2019. Air pollution, chronic smoking, and mortality. *Eur Heart J* 40:3204, 10.1093/eurheartj/ehz439
- Li H, Xu X-L, Dai D-W, Huang Z-Y, Ma Z, Guan Y-J. 2020. Air pollution and temperature are associated with increased COVID-19 incidence: A time series study. *Int J Infect Dis* 97:278-282, 10.1016/j.ijid.2020.05.076
- Liang D, Shi L, Zhao J, Liu P, Schwartz J, Gao S, et al. 2020. Urban Air Pollution May Enhance COVID-19 Case-Fatality and Mortality Rates in the United States. *medRxiv : the preprint server for health sciences*:2020.2005.2004.20090746, 10.1101/2020.05.04.20090746
- Lippi G, Sanchis-Gomar F, Henry BM. 2020. Association between environmental pollution and prevalence of coronavirus disease 2019 (COVID-19) in Italy. *medRxiv*:2020.2004.2022.20075986, 10.1101/2020.04.22.20075986
- Martelletti L, Martelletti P. 2020. Air Pollution and the Novel Covid-19 Disease: a Putative Disease Risk Factor. *SN Compr Clin Med*:1-5, 10.1007/s42399-020-00274-4
- Mehta P, McAuley DF, Brown M, Sanchez E, Tattersall RS, Manson JJ, et al. 2020. COVID-19: consider cytokine storm syndromes and immunosuppression. *Lancet* 395:1033-1034, 10.1016/S0140-6736(20)30628-0

Mutambudzi M, Niedzwiedz CL, Macdonald EB, Leyland AH, Mair FS, Anderson JJ, et al. 2020.

Occupation and risk of COVID-19: prospective cohort study of 120,621 UK Biobank participants. medRxiv:2020.2005.2022.20109892, 10.1101/2020.05.22.20109892

National Institutes of Health, National Library of Medicine, National Center for Biotechnology Information. PubMed.gov. Available: <https://pubmed.ncbi.nlm.nih.gov/> [accessed August 8 2020].

Ogen Y. 2020. Assessing nitrogen dioxide (NO<sub>2</sub>) levels as a contributing factor to coronavirus (COVID-19) fatality. Science of The Total Environment 726:138605, <https://doi.org/10.1016/j.scitotenv.2020.138605>

Pansini R, Fornacca D. 2020a. Initial evidence of higher morbidity and mortality due to SARS-CoV-2 in regions with lower air quality. medRxiv:2020.2004.2004.20053595, 10.1101/2020.04.04.20053595

Pansini R, Fornacca D. 2020b. Higher virulence of COVID-19 in the air-polluted regions of eight severely affected countries. medRxiv:2020.2004.2030.20086496, 10.1101/2020.04.30.20086496

Rhee J, Dominici F, Zanobetti A, Schwartz J, Wang Y, Di Q, et al. 2019. Impact of Long-Term Exposures to Ambient PM(2.5) and Ozone on ARDS Risk for Older Adults in the United States. Chest 156:71-79, 10.1016/j.chest.2019.03.017

Ruan Q, Yang K, Wang W, Jiang L, Song J. 2020. Clinical predictors of mortality due to COVID-19 based on an analysis of data of 150 patients from Wuhan, China. Intensive Care Med 46:846-848, 10.1007/s00134-020-05991-x

Setti L, Passarini F, De Gennaro G, Barbieri P, Perrone MG, Piazzalunga A, et al. 2020. The Potential role of Particulate Matter in the Spreading of COVID-19 in Northern Italy: First Evidence-based Research Hypotheses. medRxiv:2020.2004.2011.20061713, 10.1101/2020.04.11.20061713

Shilling F, Waetjen D. 2020. Special Report: Impact of COVID19 on California Traffic Accidents.

Available:

[https://roadecology.ucdavis.edu/files/content/projects/COVID\\_CHIPs\\_Impacts\\_updated.pdf](https://roadecology.ucdavis.edu/files/content/projects/COVID_CHIPs_Impacts_updated.pdf) [accessed August 7 2020].

Sittig DF, Singh H. 2020. COVID-19 and the Need for a National Health Information Technology Infrastructure. JAMA 323:2373-2374, 10.1001/jama.2020.7239

Szpiro AA, Sheppard L, Lumley T. 2011. Efficient measurement error correction with spatially misaligned data. Biostatistics 12:610-623, 10.1093/biostatistics/kxq083

Tian H, Liu Y, Song H, Wu C-H, Li B, Kraemer MUG, et al. 2020. Risk of COVID-19 is associated with long-term exposure to air pollution. medRxiv:2020.2004.2021.20073700, 10.1101/2020.04.21.20073700

Tian T, Zhang J, Hu L, Jiang Y, Duan C, Li Z, et al. 2020. Risk factors associated with mortality of COVID-19 in 2692 counties of the United States. medRxiv:2020.2005.2018.20105544, 10.1101/2020.05.18.20105544

Travaglio M, Yu Y, Popovic R, Selley L, Leal NS, Martins LM. 2020. Links between air pollution and COVID-19 in England. medRxiv:2020.2004.2016.20067405, 10.1101/2020.04.16.20067405

US Environmental Protection Agency. 2020. Integrated Science Assessment (ISA) for Particulate Matter. Available: <https://www.epa.gov/isa/integrated-science-assessment-isa-particulate-matter> [accessed August 3 2020].

Wang B, Liu J, Fu S, Xu X, Li L, Ma Y, et al. 2020. An effect assessment of Airborne particulate matter pollution on COVID-19: A multi-city Study in China. medRxiv:2020.2004.2009.20060137, 10.1101/2020.04.09.20060137

Wang D, Hu B, Hu C, Zhu F, Liu X, Zhang J, et al. 2020. Clinical Characteristics of 138 Hospitalized Patients With 2019 Novel Coronavirus-Infected Pneumonia in Wuhan, China. JAMA, 10.1001/jama.2020.1585



Wikipedia. 2020. Template: COVID-19 Pandemic Data. Available:

[https://en.wikipedia.org/wiki/Template:COVID-19\\_pandemic\\_data](https://en.wikipedia.org/wiki/Template:COVID-19_pandemic_data) [accessed August 3 2020].

Wu X, Nethery RC, Sabath BM, Braun D, Dominici F. 2020. Exposure to air pollution and COVID-19 mortality in the United States: A nationwide cross-sectional study. medRxiv : the preprint server for health sciences:2020.2004.2005.20054502, 10.1101/2020.04.05.20054502

Xu H, Yan C, Fu Q, Xiao K, Yu Y, Han D, et al. 2020. Possible environmental effects on the spread of COVID-19 in China. Sci Total Environ 731:139211-139211, 10.1016/j.scitotenv.2020.139211

Xu Z, Shi L, Wang Y, Zhang J, Huang L, Zhang C, et al. 2020. Pathological findings of COVID-19 associated with acute respiratory distress syndrome. Lancet Respir Med 8:420-422, 10.1016/S2213-2600(20)30076-X

Yancy CW. 2020. COVID-19 and African Americans. JAMA 323:1891-1892, 10.1001/jama.2020.6548

Yao Y, Pan J, Liu Z, Meng X, Wang W, Kan H, et al. 2020a. Ambient nitrogen dioxide pollution and spread ability of COVID-19 in Chinese cities. medRxiv:2020.2003.2031.20048595, 10.1101/2020.03.31.20048595

Yao Y, Pan J, Liu Z, Meng X, Wang W, Kan H, et al. 2020b. Temporal Association Between Particulate Matter Pollution and Case Fatality Rate of COVID-19 in Wuhan, China. medRxiv:2020.2004.2009.20049924, 10.1101/2020.04.09.20049924

Yao Y, Pan J, Wang W, Liu Z, Kan H, Meng X, et al. 2020c. Spatial Correlation of Particulate Matter Pollution and Death Rate of COVID-19. medRxiv:2020.2004.2007.20052142, 10.1101/2020.04.07.20052142

Zhang R, Zhang Y, Lin H, Feng X, Fu T-M. 2020. NO<sub>x</sub> Emission Reduction and Recovery during COVID-19 in East China. Atmosphere 11:433, 10.3390/atmos11040433

Zhang T, Zhao G, Luo L, Li Y, Shi W. 2020. Associations between ambient air pollutants exposure and case fatality rate of COVID-19: a multi-city ecological study in China. medRxiv:2020.2005.2006.20088682, 10.1101/2020.05.06.20088682

Zhou J, Qin L, Liu N. 2020. Ambient air pollutants, meteorological factors and their interactions affect confirmed cases of COVID-19 in 120 Chinese cities. medRxiv:2020.2005.2027.20111542, 10.1101/2020.05.27.20111542

Zhu Y, Xie J, Huang F, Cao L. 2020. Association between short-term exposure to air pollution and COVID-19 infection: Evidence from China. Science of The Total Environment 727:138704, <https://doi.org/10.1016/j.scitotenv.2020.138704>

## Tables

**Table 1.** Long-term Studies Included in this Scoping Review

| Title (Source)                                                                                                                                                        | Author                     | Geographical Area of Study                                                                                                      | Research Question                                                                                                                                                                                              | Outcome                                                                                                                                                                                                       | Exposure                                                                                                                                                                                                                                                                                                                                                                                                                                                                                                                                                                                                                                     | Statistical Methods                        | Significant Positive Results                                                                                                                                                                                                                                                                                                                                                                                                                                                                                                                                                                 | Non-Significant Results and Significant Negative Results                                                                                                                                                                                                                                                                                                                                                 | Covariates or Possible Confounders                                                                                                                                                                                                                                                                                                                                                                                                                                          | Code Availability (link) |
|-----------------------------------------------------------------------------------------------------------------------------------------------------------------------|----------------------------|---------------------------------------------------------------------------------------------------------------------------------|----------------------------------------------------------------------------------------------------------------------------------------------------------------------------------------------------------------|---------------------------------------------------------------------------------------------------------------------------------------------------------------------------------------------------------------|----------------------------------------------------------------------------------------------------------------------------------------------------------------------------------------------------------------------------------------------------------------------------------------------------------------------------------------------------------------------------------------------------------------------------------------------------------------------------------------------------------------------------------------------------------------------------------------------------------------------------------------------|--------------------------------------------|----------------------------------------------------------------------------------------------------------------------------------------------------------------------------------------------------------------------------------------------------------------------------------------------------------------------------------------------------------------------------------------------------------------------------------------------------------------------------------------------------------------------------------------------------------------------------------------------|----------------------------------------------------------------------------------------------------------------------------------------------------------------------------------------------------------------------------------------------------------------------------------------------------------------------------------------------------------------------------------------------------------|-----------------------------------------------------------------------------------------------------------------------------------------------------------------------------------------------------------------------------------------------------------------------------------------------------------------------------------------------------------------------------------------------------------------------------------------------------------------------------|--------------------------|
| Assessing nitrogen dioxide (NO <sub>2</sub> ) levels as a contributing factor to the coronavirus (COVID-19) fatality rate ( <i>Science of the Total Environment</i> ) | Ogen 2020                  | Italy, Spain, France, and Germany: 66 Administrative Regions                                                                    | What is the relationship between long-term exposure to NO <sub>2</sub> and COVID-19 fatality?                                                                                                                  | COVID-19 deaths up to March 19, 2020                                                                                                                                                                          | <ul style="list-style-type: none"> <li>Maximum NO<sub>2</sub> concentrations for January and February 2020 (Sentinel-5 Precursor space-borne satellite, spatial resolution 5.5 km), with vertical airflows at 850 mb (NOAA/OAR/ESRL PSD)</li> </ul>                                                                                                                                                                                                                                                                                                                                                                                          | Descriptive                                | N/A                                                                                                                                                                                                                                                                                                                                                                                                                                                                                                                                                                                          | "Of the 4,443 total fatality cases, 3487 (78%) were in five regions located in north Italy and central Spain. These five regions show the highest NO <sub>2</sub> concentrations combined with downwards airflow."                                                                                                                                                                                       | None                                                                                                                                                                                                                                                                                                                                                                                                                                                                        | No                       |
| Incidence of COVID-19 and connections with air pollution exposure: evidence from the Netherlands (medRxiv)                                                            | Andree 2020                | Netherlands: 355 municipalities                                                                                                 | What is the relationship between long-term exposure to PM <sub>2.5</sub> and COVID-19 incidence?                                                                                                               | COVID-19 cases and hospitalizations up to March 31, 2020                                                                                                                                                      | <ul style="list-style-type: none"> <li>Mean PM<sub>2.5</sub> concentrations in 2017 computed from daily concentrations (RIVM)</li> <li>Spatial interpolation of ground measurements were used to provide concentrations at a 25-m grid spatial resolution</li> <li>Grids were averaged to the municipality level</li> </ul>                                                                                                                                                                                                                                                                                                                  | Non-parametric penalized kernel regression | Expected COVID-19 cases and related hospital admissions increased by approximately 100% when PM <sub>2.5</sub> concentration increased by 20% from the WHO PM <sub>2.5</sub> baseline concentration of 10 µg/m <sup>3</sup> to 12 µg/m <sup>3</sup>                                                                                                                                                                                                                                                                                                                                          | N/A                                                                                                                                                                                                                                                                                                                                                                                                      | Population density, gender, age structure, proportion of unmarried population, proportion of single households, proportion of households without children, average household size, proportion of long-term illness, proportion of western and non-western immigrants, proportion exposed to noise above and below 50 km, proportion of overweight, proportion with obesity, proportion of non-heavy drinkers, proportion of smokers, proportion of surface covered by water | No                       |
| Initial evidence of higher morbidity and mortality due to SARS-CoV-2 in regions with lower air quality (medRxiv)                                                      | Pansini and Fornacca 2020a | <ul style="list-style-type: none"> <li>China: prefectures</li> <li>Italy: provinces</li> <li>United States: counties</li> </ul> | What is the relationship between long-term exposure to aerosol, PM <sub>2.5</sub> , PM <sub>10</sub> , O <sub>3</sub> , NO <sub>2</sub> , SO <sub>2</sub> , CO, and HCHO and COVID-19 morbidity and mortality? | <ul style="list-style-type: none"> <li>China: COVID-19 cases and deaths up to March 24, 2020</li> <li>Italy: COVID-19 cases up to March 23, 2020</li> <li>USA: COVID-19 cases up to March 29, 2020</li> </ul> | <ul style="list-style-type: none"> <li>Aerosol, PM<sub>2.5</sub>, PM<sub>10</sub>, O<sub>3</sub>, NO<sub>2</sub>, SO<sub>2</sub>, CO, and HCHO concentrations taken from satellite and ground-level</li> <li>All satellite data was from 2019 at a 0.01-degree spatial resolution (Sentinel-5)</li> <li>China ground data was aggregated monthly air quality data for 2014–2016 extracted at GPS points (Harvard Dataverse)</li> <li>Italian ground data was from annual data for 2013–2016 extracted with location name (Ambient Air Quality Database, WHO)</li> <li>USA ground data was from 2019 extracted at GPS points (EPA)</li> </ul> | Kendall tau correlation                    | <ul style="list-style-type: none"> <li>Significant positive correlations between COVID-19 cases and air quality in USA, China, and Italy</li> <li>Significant positive correlations observed between COVID-19 deaths and air quality variables in USA and China</li> <li>CO, HCHO, NO<sub>2</sub>, PM<sub>2.5</sub>, and PM<sub>10</sub> had positive correlations with COVID-19 cases (0.12&lt;tau&lt;0.52; 0.000&lt;p&lt;0.024) and deaths (0.03&lt;tau&lt;0.27; 0.000&lt;p&lt;0.030)</li> <li>O<sub>3</sub> had a positive correlation with COVID-19 cases (tau=0.35, p=0.000)</li> </ul> | <ul style="list-style-type: none"> <li>Aerosol and SO<sub>2</sub> had negative significant correlations and non-significant correlations with COVID-19 cases (-0.17&lt;tau&lt;0.01, 0.000&lt;p&lt;0.863) and deaths (-0.10&lt;tau&lt;0.07, 0.000&lt;p&lt;0.933)</li> <li>O<sub>3</sub> had negative significant correlations with COVID-19 deaths (-0.08&lt;tau&lt;0.01, 0.022&lt;p&lt;0.885)</li> </ul> | None                                                                                                                                                                                                                                                                                                                                                                                                                                                                        | No                       |
| Higher virulence of COVID-19 in the air polluted regions of 8 severely affected countries (medRxiv)                                                                   | Pansini and Fornacca 2020b | China, Italy, Iran, United States, Spain, France, Germany, and the United Kingdom: equivalent of                                | What is the relationship between long-term exposure to PM <sub>2.5</sub> , NO <sub>2</sub> , CO, PM <sub>10</sub> , O <sub>3</sub> , and SO <sub>2</sub> and COVID-19                                          | <ul style="list-style-type: none"> <li>China: COVID-19 cases and deaths up to May 23, 2020</li> <li>Italy: COVID-19 cases and deaths up to March 22, 2020</li> <li>USA: COVID-19</li> </ul>                   | <ul style="list-style-type: none"> <li>PM<sub>2.5</sub> (satellite and ground), NO<sub>2</sub> (satellite and ground), CO, PM<sub>10</sub>, O<sub>3</sub>, SO<sub>2</sub> (all ground)</li> <li>PM<sub>2.5</sub> satellite data: annual concentrations 1998–2016 extracted at a 0.01-degree spatial resolution (MODIS,</li> </ul>                                                                                                                                                                                                                                                                                                            | Kendall tau correlation                    | <ul style="list-style-type: none"> <li>Significant positive correlations between COVID-19 cases and air quality in China, USA, Italy, Iran, France, but not in Spain, UK, and Germany</li> <li>Significantly positive</li> </ul>                                                                                                                                                                                                                                                                                                                                                             | O <sub>3</sub> and SO <sub>2</sub> had negative significant correlations or non-significant correlations with COVID-19 cases (-0.12<tau<0.03, 0.002<p<0.843) and deaths (-0.08<tau<0.06, 0.028<p<0.925)                                                                                                                                                                                                  | None                                                                                                                                                                                                                                                                                                                                                                                                                                                                        | No                       |

county-level in all countries morbidity and mortality?

cases and deaths up to May 21, 2020

- Iran: COVID-19 cases up to March 22, 2020
- France: COVID-19 deaths up to May 22, 2020
- Spain: COVID-19 cases and deaths up to May 22, 2020
- Germany: COVID-19 cases and deaths up to May 25, 2020
- UK: COVID-19 cases up to June 1, 2020, deaths up to May 24, 2020

MISR, and SeaWiFS Aerosol Optical Depth with GWR)

- NO<sub>2</sub> satellite data: 3-year running mean concentrations 1996–2012 extracted at a 0.01-degree spatial resolution (GOME, SCIAMACHY and GOME-2)
- China ground data: aggregated monthly air quality data for the years 2014–2016 extracted at GPS points (Harvard Dataverse)
- Italian ground data: from 2013–2016 extracted with location name (Ambient Air Quality Database, WHO)
- USA ground data is from 2019 extracted at GPS points (EPA)

correlations between COVID-19 deaths and air quality in China, USA, Italy, Iran, France, and the UK, but not in Spain and Germany

- PM<sub>2.5</sub>, NO<sub>2</sub>, PM<sub>10</sub>, and CO had positive correlations with COVID-19 cases (0.12<tau<0.62; 0.000<p<0.004) and deaths (0.12<tau<0.83; 0.000<p<0.031)

|                                                                                                           |                    |                              |                                                                                                                                                                     |                                                                              |                                                                                                                                                                                                                                                                                                                                                                                                            |                               |                                                                                                                                                                                                                                                                                     |                                                                                                                                                                                                                                                                                   |                                                                                                                                                                                                                                                                                                                                                                                                                                    |    |
|-----------------------------------------------------------------------------------------------------------|--------------------|------------------------------|---------------------------------------------------------------------------------------------------------------------------------------------------------------------|------------------------------------------------------------------------------|------------------------------------------------------------------------------------------------------------------------------------------------------------------------------------------------------------------------------------------------------------------------------------------------------------------------------------------------------------------------------------------------------------|-------------------------------|-------------------------------------------------------------------------------------------------------------------------------------------------------------------------------------------------------------------------------------------------------------------------------------|-----------------------------------------------------------------------------------------------------------------------------------------------------------------------------------------------------------------------------------------------------------------------------------|------------------------------------------------------------------------------------------------------------------------------------------------------------------------------------------------------------------------------------------------------------------------------------------------------------------------------------------------------------------------------------------------------------------------------------|----|
| Urban air pollution may enhance COVID-19 case fatality and mortality rates in the United States (medRxiv) | Liang et al., 2020 | United States: 3122 counties | What is the relationship between long-term exposure to NO <sub>2</sub> , PM <sub>2.5</sub> , and O <sub>3</sub> and COVID-19 case fatality rate and mortality rate? | COVID-19 case-fatality and mortality rate: January 22, 2020 – April 29, 2020 | <ul style="list-style-type: none"> <li>Mean NO<sub>2</sub>, PM<sub>2.5</sub>, and O<sub>3</sub> concentrations from 2010–2016 calculated from daily mean concentrations taken at 1-km<sup>2</sup> spatial resolution (ensemble model - Di et al., 2019a and Di et al., 2019b)</li> <li>County-level concentrations were taken as an average of all 1-km<sup>2</sup> areas covered by the county</li> </ul> | Negative binomial mixed model | Observed significant positive associations between NO <sub>2</sub> levels and both county-level COVID-19 case fatality rate (main effect estimate: 1.015, CI: 1.003, 1.028) and mortality rate (main effect estimate: 1.023, CI: 1.007, 1.039) with p=0.02 and p<0.001 respectively | <ul style="list-style-type: none"> <li>PM<sub>2.5</sub> was not significantly associated with case fatality rate or mortality rate (p=0.87, p=0.08)</li> <li>O<sub>3</sub> was not significantly associated with case fatality rate or mortality rate (p=0.42, p=0.22)</li> </ul> | State-level test positive rate, county-level healthcare capacity (number of ICU beds and active medical doctors per 1000 people), phase of epidemic, population mobility, socio-demographics (population density, percentage of elderly, percentage of male), socioeconomic status (social deprivation index), behavioral risk factors (mean BMI and smoking rate), meteorological factors (air temperature and relative humidity) | No |
|-----------------------------------------------------------------------------------------------------------|--------------------|------------------------------|---------------------------------------------------------------------------------------------------------------------------------------------------------------------|------------------------------------------------------------------------------|------------------------------------------------------------------------------------------------------------------------------------------------------------------------------------------------------------------------------------------------------------------------------------------------------------------------------------------------------------------------------------------------------------|-------------------------------|-------------------------------------------------------------------------------------------------------------------------------------------------------------------------------------------------------------------------------------------------------------------------------------|-----------------------------------------------------------------------------------------------------------------------------------------------------------------------------------------------------------------------------------------------------------------------------------|------------------------------------------------------------------------------------------------------------------------------------------------------------------------------------------------------------------------------------------------------------------------------------------------------------------------------------------------------------------------------------------------------------------------------------|----|

|                                                                                                                     |                 |                              |                                                                                              |                 |                                                                                                                                                                                                                                                                                                                                                                                                         |                               |                                                                                                                                         |     |                                                                                                                                                                                                                                                                                                                                                                                                                                                                      |                                                                                                 |
|---------------------------------------------------------------------------------------------------------------------|-----------------|------------------------------|----------------------------------------------------------------------------------------------|-----------------|---------------------------------------------------------------------------------------------------------------------------------------------------------------------------------------------------------------------------------------------------------------------------------------------------------------------------------------------------------------------------------------------------------|-------------------------------|-----------------------------------------------------------------------------------------------------------------------------------------|-----|----------------------------------------------------------------------------------------------------------------------------------------------------------------------------------------------------------------------------------------------------------------------------------------------------------------------------------------------------------------------------------------------------------------------------------------------------------------------|-------------------------------------------------------------------------------------------------|
| Exposure to air pollution and COVID-19 mortality in the United States. A nationwide cross sectional study (medRxiv) | Wu et al., 2020 | United States: 3087 counties | What is the relationship between long-term exposure to PM <sub>2.5</sub> and COVID-19 death? | COVID-19 deaths | <ul style="list-style-type: none"> <li>Mean PM<sub>2.5</sub> levels from January 1, 2000 to December 31, 2016 at a 0.01-degree spatial resolution calculated from monthly concentrations (Atmospheric Composition Analysis Group)</li> <li>PM<sub>2.5</sub> levels were aggregated at the county level by taking the average PM<sub>2.5</sub> concentration at grid points within the county</li> </ul> | Negative binomial mixed model | An increase of 1 µg/m <sup>3</sup> in PM <sub>2.5</sub> was associated with an 8% (95% CI: 2%, 15%) increase in the COVID-19 death rate | N/A | Days since first COVID-19 case reported (epidemic stage), population density, percent population above 65, 45-64, 15-44 years of age, poverty rate, median household income, percent Black, percent Hispanic, percent with less than high school education, median house value, percent owner-occupied housing, percent obese, percent current smokers, number of hospital beds per unit population, average daily temperature, humidity, days of stay at home order | Yes ( <a href="https://github.com/wxwx1993/PM_COVID">https://github.com/wxwx1993/PM_COVID</a> ) |
|---------------------------------------------------------------------------------------------------------------------|-----------------|------------------------------|----------------------------------------------------------------------------------------------|-----------------|---------------------------------------------------------------------------------------------------------------------------------------------------------------------------------------------------------------------------------------------------------------------------------------------------------------------------------------------------------------------------------------------------------|-------------------------------|-----------------------------------------------------------------------------------------------------------------------------------------|-----|----------------------------------------------------------------------------------------------------------------------------------------------------------------------------------------------------------------------------------------------------------------------------------------------------------------------------------------------------------------------------------------------------------------------------------------------------------------------|-------------------------------------------------------------------------------------------------|

|                                                                                   |                        |                                                                                                                       |                                                                                                                                                                                                            |                                                                                     |                                                                                                                                                                                                                                                                                                                                                                                                                                                                                                                                                                |                                           |                                                                                                                                                                                                                                                                                                                                                                                                                                                                                                                                                                                                                                                                                                                                                                                                                                                                                                                            |                                                                                                                                                                                                                                                                                                                                                                                                                                                                                                                   |                                                                                                                                                                                                                                                                                                                                                                                                                                                                                                                                                                                                                                                                          |                                                                                                                    |
|-----------------------------------------------------------------------------------|------------------------|-----------------------------------------------------------------------------------------------------------------------|------------------------------------------------------------------------------------------------------------------------------------------------------------------------------------------------------------|-------------------------------------------------------------------------------------|----------------------------------------------------------------------------------------------------------------------------------------------------------------------------------------------------------------------------------------------------------------------------------------------------------------------------------------------------------------------------------------------------------------------------------------------------------------------------------------------------------------------------------------------------------------|-------------------------------------------|----------------------------------------------------------------------------------------------------------------------------------------------------------------------------------------------------------------------------------------------------------------------------------------------------------------------------------------------------------------------------------------------------------------------------------------------------------------------------------------------------------------------------------------------------------------------------------------------------------------------------------------------------------------------------------------------------------------------------------------------------------------------------------------------------------------------------------------------------------------------------------------------------------------------------|-------------------------------------------------------------------------------------------------------------------------------------------------------------------------------------------------------------------------------------------------------------------------------------------------------------------------------------------------------------------------------------------------------------------------------------------------------------------------------------------------------------------|--------------------------------------------------------------------------------------------------------------------------------------------------------------------------------------------------------------------------------------------------------------------------------------------------------------------------------------------------------------------------------------------------------------------------------------------------------------------------------------------------------------------------------------------------------------------------------------------------------------------------------------------------------------------------|--------------------------------------------------------------------------------------------------------------------|
| Links between air pollution and COVID-19 in England (medRxiv)                     | Travaglio et al., 2020 | England: 7 regions, 343 local-authorities, and 1450 individuals, of which 669 were diagnosed as positive for COVID-19 | What is the relationship between long-term exposure to NO <sub>2</sub> , NO, O <sub>3</sub> , PM <sub>2.5</sub> , PM <sub>10</sub> , and SO <sub>2</sub> and COVID-19 cases and deaths?                    | COVID-19 cases and deaths up to April 10, 2020                                      | <ul style="list-style-type: none"> <li>Mean NO<sub>2</sub>, NO, and O<sub>3</sub> levels from 2018–2019 calculated from daily mean concentrations at air quality monitors aggregated to the regional level (EEA)</li> <li>Mean 2018 NO<sub>2</sub>, NO, PM<sub>2.5</sub>, PM<sub>10</sub>, and SO<sub>2</sub> levels calculated from daily mean concentrations and O<sub>3</sub> daily limit exceedances (greater than 120 µg/m<sup>3</sup>) taken from air quality stations aggregated to the local-authority level (UK Air Information Resources)</li> </ul> | Multivariate negative binomial regression | <ul style="list-style-type: none"> <li>At a regional level, O<sub>3</sub>, NO, and NO<sub>2</sub> levels were significantly positively associated with COVID-19 deaths and cases (p&lt;0.05)</li> <li>At the sub regional level, an increase of 1 µg/m<sup>3</sup> in SO<sub>2</sub> was associated with a 7.2% (95% CI: 0.5%, 36.9%) increase in the COVID-19 infection rate and a 31.6% (95% CI: 14.1%, 52.1%) increase in the COVID-19 death rate</li> <li>NO and NO<sub>2</sub> concentrations were associated with significant mortality and infectivity rates of approximately 1.03</li> <li>At the individual level, PM<sub>2.5</sub> and PM<sub>10</sub> were significant predictors of increased infectivity with odds ratios of 1.120 (95% CI: 1.036, 1.211) and 1.074 (95% CI: 1.017, 1.136) respectively</li> <li>Both NO and NO<sub>2</sub> showed an infectivity odds ratio of approximately 1.03</li> </ul> | <ul style="list-style-type: none"> <li>At the sub regional level, PM<sub>2.5</sub>, PM<sub>10</sub>, and O<sub>3</sub> showed significant negative infection rates of approximately 0.95</li> <li>PM<sub>2.5</sub> and PM<sub>10</sub> showed non-significant mortality rates of approximately 0.975</li> <li>At the individual level, SO<sub>2</sub> and O<sub>3</sub> levels were not significant predictors of infectivity, with infection odds ratios of approximately 1.18 and 1.02, respectively</li> </ul> | <ul style="list-style-type: none"> <li>Regional and sub regional level: population density, mean annual earnings, median age</li> <li>Individual level: Townsend deprivation index (accounts for unemployment, non-car ownership, non-home ownership, and house overcrowding), age, waist circumference divided by hip circumference, high blood pressure, dusty workplace, chemical fumes in workplace, cigarette smoke in workplace, diesel exhaust in workplace, breathing problems during the job, wheeze or whistling in the chest in the last year, sex, forced expiratory volume, COPD diagnosis, diabetes diagnosis, cancer diagnosis, smoking status</li> </ul> | Yes<br>( <a href="https://github.com/M1gus/AirPollutionCOVID19">https://github.com/M1gus/AirPollutionCOVID19</a> ) |
| Risk of COVID-19 is associated with long-term exposure to air pollution (medRxiv) | Tian et al., 2020a     | China: 324 cities                                                                                                     | What is the relationship between long-term exposure to PM <sub>2.5</sub> , PM <sub>10</sub> , SO <sub>2</sub> , CO, NO <sub>2</sub> , and NO <sub>3</sub> and COVID-19 cases and percent severe infection? | COVID-19 cases and percent with severe infection: December 31, 2019 – March 6, 2020 | Mean PM <sub>2.5</sub> , PM <sub>10</sub> , SO <sub>2</sub> , CO, NO <sub>2</sub> , and O <sub>3</sub> concentrations from January 2015 to March 2020 taken from daily mean concentrations at air quality stations aggregated to the city level                                                                                                                                                                                                                                                                                                                | Multivariate Poisson regression model     | <ul style="list-style-type: none"> <li>An increase of 10 µg/m<sup>3</sup> in NO<sub>2</sub> and PM<sub>2.5</sub> was associated with a 22.41% (95% CI: 7.28%, 39.89%) and 15.35% (95% CI: 5.60%, 25.98%) increase, respectively, in the number of COVID-19 cases</li> <li>An increase of 10 µg/m<sup>3</sup> in NO<sub>2</sub> and PM<sub>2.5</sub> was associated with a 19.20% (95% CI: 4.03%-36.59%) and 9.61% (95%CI: 0.12%-20.01%) increase, respectively, in severe infection</li> </ul>                                                                                                                                                                                                                                                                                                                                                                                                                             | PM <sub>10</sub> , SO <sub>2</sub> , CO, and O <sub>3</sub> were not significantly associated with confirmed COVID-19 cases (-0.016<coeff<0.002, 0.050<p<0.958) and severe COVID-19 cases (-0.049<coeff<0.001, 0.049<p<0.817)                                                                                                                                                                                                                                                                                     | Gross domestic product per capita, age composition, travel movements from Wuhan and intra-city movements, temperature                                                                                                                                                                                                                                                                                                                                                                                                                                                                                                                                                    | No                                                                                                                 |
| Role of the atmospheric pollution in the                                          | Fattorini and Regoli   | Italy: 71 provinces                                                                                                   | What is the relationship between long-term                                                                                                                                                                 | COVID-19 cases: February 24, 2020 – April 27, 2020                                  | NO <sub>2</sub> , PM <sub>2.5</sub> , and PM <sub>10</sub> concentrations averaged from January 2016 to December 2019 and days exceeding                                                                                                                                                                                                                                                                                                                                                                                                                       | Univariate linear regression              | Significant correlation between PM <sub>2.5</sub> (r=0.58, p<0.01), NO <sub>2</sub> (r=0.50, p<0.01), and PM <sub>10</sub>                                                                                                                                                                                                                                                                                                                                                                                                                                                                                                                                                                                                                                                                                                                                                                                                 | N/A                                                                                                                                                                                                                                                                                                                                                                                                                                                                                                               | None                                                                                                                                                                                                                                                                                                                                                                                                                                                                                                                                                                                                                                                                     | No                                                                                                                 |

|                                                                                                                                                                                                                            |                     |                                                                                                   |                                                                                                                      |                                      |                                                                                                                                                                                                                  |                                                                                                      |                                                                                                                                                                                                                                                                                                            |     |                                                                                                                                                                                                                                                                                                                                                                        |    |
|----------------------------------------------------------------------------------------------------------------------------------------------------------------------------------------------------------------------------|---------------------|---------------------------------------------------------------------------------------------------|----------------------------------------------------------------------------------------------------------------------|--------------------------------------|------------------------------------------------------------------------------------------------------------------------------------------------------------------------------------------------------------------|------------------------------------------------------------------------------------------------------|------------------------------------------------------------------------------------------------------------------------------------------------------------------------------------------------------------------------------------------------------------------------------------------------------------|-----|------------------------------------------------------------------------------------------------------------------------------------------------------------------------------------------------------------------------------------------------------------------------------------------------------------------------------------------------------------------------|----|
| COVID-19 outbreak risk in Italy (medRxiv)                                                                                                                                                                                  | 2020                |                                                                                                   | exposure to NO <sub>2</sub> , O <sub>3</sub> , and PM <sub>2.5</sub> and COVID-19 cases?                             |                                      | regulatory limits for O <sub>3</sub> (greater than 120 µg/m <sup>3</sup> ) and PM <sub>10</sub> (greater than 50 µg/m <sup>3</sup> ) from January 2017 to January 2019 at a provincial spatial resolution (EEA)  |                                                                                                      | (r=0.52, p<0.01) concentrations, and O <sub>3</sub> (r=0.51, p<0.01) and PM <sub>10</sub> (r=0.41, p<0.05) daily limit exceedances and the number of COVID cases                                                                                                                                           |     |                                                                                                                                                                                                                                                                                                                                                                        |    |
| Two mechanisms for accelerated diffusion of COVID-19 outbreaks in regions with high intensity of population and polluting industrialization: the air pollution-to-human and human-to-human transmission dynamics (medRxiv) | Coccia et al., 2020 | Italy: 55 provincial capitals                                                                     | What is the relationship between long-term exposure to PM <sub>10</sub> and O <sub>3</sub> and COVID-19 cases?       | COVID-19 cases up to April 30, 2020  | Days exceeding limits set for PM <sub>10</sub> (greater than 50 µg/m <sup>3</sup> ) or O <sub>3</sub> (greater than 120 µg/m <sup>3</sup> ) in 2018 at provincial capitals (Legambiente)                         | Multiple linear regression                                                                           | The days PM <sub>10</sub> and O <sub>3</sub> exceeded limits in 2018 were significantly associated with COVID-19 cases on March 17, 2020 (r=0.643, p=0.001) and April 1, 2020 (r=0.620, p=0.001)                                                                                                           | N/A | Temperature, percent moisture, wind speed                                                                                                                                                                                                                                                                                                                              | No |
| Association between environmental pollution and prevalence of coronavirus disease 2019 (COVID-19) in Italy (medRxiv)                                                                                                       | Lippi et al., 2020  | Italy: provinces with greater than 26 days of O <sub>3</sub> and PM <sub>10</sub> limits exceeded | What is the relationship between long-term PM <sub>10</sub> and O <sub>3</sub> daily exceedances and COVID-19 cases? | COVID-19 cases up to April 5, 2020   | Days per year in which the limits set for PM <sub>10</sub> (greater than 50 µg/m <sup>3</sup> ) or O <sub>3</sub> (greater than 120 µg/m <sup>3</sup> ) were exceeded in 2018 in Italian provinces (Legambiente) | Univariate linear regression                                                                         | Association between PM <sub>10</sub> and O <sub>3</sub> daily limit exceedances and COVID-19 cases was statistically significant for raw counts [r=0.66 (95% CI: 0.48, 0.79) p<0.001] and counts per 1000 persons [r=0.43 (95% CI: 0.18, 0.62) p=0.001]                                                    | N/A | None                                                                                                                                                                                                                                                                                                                                                                   | No |
| Risk factors associated with mortality of COVID-19 in 2692 counties of the United States (medRxiv)                                                                                                                         | Tian et al., 2020b  | United States: 2692 counties                                                                      | What is the relationship between long-term PM <sub>2.5</sub> concentration and COVID-19 deaths?                      | COVID-19 deaths up to April 15, 2020 | Mean PM <sub>2.5</sub> concentrations before 2019 during an unspecified period of time calculated from daily PM <sub>2.5</sub> concentrations at the county level (Environmental Public Health Tracking Network) | Partitioning Around Medoids (PAM) clustering algorithm and multivariate negative binomial regression | In the high prevalence group of counties (metropolis areas), higher levels of PM <sub>2.5</sub> were associated with greater COVID-19 mortality (coeff=0.186, p=0.005).<br><br>PM <sub>2.5</sub> was not significantly associated with COVID-19 mortality in median prevalence and low prevalence counties |     | Proportion with access to exercise opportunities, proportion with insufficient sleep, primary care physicians ratio, segregation index whites/non-whites, proportion of workers with long commutes, proportion of workers who drive alone, proportion of rural residents, proportion of Hispanic residents, proportion of females, proportion over the age of 65 years | No |

**Table 2. Short-term Time-series Studies Included in this Scoping Review**

| Title (Source)                                                                                                                             | Author             | Geographical Area of Study          | Research Question                                                                                                                                                               | Outcome                                                                                                            | Exposure                                                                                                                                                                                                                                                                                              | Method of Data Analysis                                                             | Significant Positive Results                                                                                                                                                                                                                                                                                                                                                                                                                                                             | Non-Significant Results and Significant Negative Results                                                                                                                                                                                                                                                                                                                                                                                                                                          | Covariates or Possible Confounders                            | Code Availability (link) |
|--------------------------------------------------------------------------------------------------------------------------------------------|--------------------|-------------------------------------|---------------------------------------------------------------------------------------------------------------------------------------------------------------------------------|--------------------------------------------------------------------------------------------------------------------|-------------------------------------------------------------------------------------------------------------------------------------------------------------------------------------------------------------------------------------------------------------------------------------------------------|-------------------------------------------------------------------------------------|------------------------------------------------------------------------------------------------------------------------------------------------------------------------------------------------------------------------------------------------------------------------------------------------------------------------------------------------------------------------------------------------------------------------------------------------------------------------------------------|---------------------------------------------------------------------------------------------------------------------------------------------------------------------------------------------------------------------------------------------------------------------------------------------------------------------------------------------------------------------------------------------------------------------------------------------------------------------------------------------------|---------------------------------------------------------------|--------------------------|
| Ambient nitrogen dioxide pollution and spread ability of COVID-19 in Chinese cities (medRxiv)                                              | Yao et al., 2020a  | China: 11 cities in Hubei Province  | What is the relationship between NO <sub>2</sub> and COVID-19 cases?                                                                                                            | Basic reproduction number (R <sub>0</sub> ): January 27, 2020 – February 26, 2020                                  | Daily NO <sub>2</sub> concentrations: January 27, 2020 – February 26, 2020, average of at least 18 hourly concentrations from state-controlled monitoring stations aggregated to the city level (China's Ministry of Environmental Protection)                                                        | Linear regression                                                                   | NO <sub>2</sub> (with 12-day time lag) was significantly positively correlated with R <sub>0</sub> ( $r>0.51$ , $p<0.005$ ) in 10 Hubei cities                                                                                                                                                                                                                                                                                                                                           | N/A                                                                                                                                                                                                                                                                                                                                                                                                                                                                                               | None                                                          | No                       |
| Temporal association between particulate matter pollution and case fatality rate of COVID-19 in Wuhan, China (medRxiv)                     | Yao et al., 2020b  | China: Wuhan                        | What is the relationship between short-term exposure to PM <sub>2.5</sub> and PM <sub>10</sub> and COVID-19 case fatality rate?                                                 | COVID-19 case fatality rate [deaths on day $x$ / new cases on day ( $x - 21$ )]: January 19, 2020 – March 15, 2020 | Daily PM <sub>2.5</sub> and PM <sub>10</sub> concentrations: January 19, 2020 – March 15, 2020 in Wuhan (National Urban Air Quality Publishing Platform)                                                                                                                                              | Multiple linear regression                                                          | <ul style="list-style-type: none"> <li>All lag 0-5 (0-5 days before infection) concentrations of PM<sub>2.5</sub> and PM<sub>10</sub> were significantly positively associated with COVID-19 fatality rate (<math>r&gt;0.36</math>, <math>p&lt;0.03</math>)</li> <li>The most significant association was with lag 3 PM<sub>2.5</sub> and PM<sub>10</sub> (<math>r=0.65</math>, <math>p=2.8 \times 10^{-5}</math> and <math>r=0.66</math>, <math>p=1.9 \times 10^{-5}</math>)</li> </ul> | N/A                                                                                                                                                                                                                                                                                                                                                                                                                                                                                               | Temperature, relative humidity                                | No                       |
| Effect of ambient air pollutants and meteorological variables on COVID-19 incidence ( <i>Infection Control and Hospital Epidemiology</i> ) | Jiang et al., 2020 | China: Wuhan, XiaoGan and HuangGang | What is the relationship between short-term exposure to PM <sub>2.5</sub> , O <sub>3</sub> , NO <sub>2</sub> , PM <sub>10</sub> , SO <sub>2</sub> , and CO, and COVID-19 cases? | COVID-19 cases: January 25, 2020 – February 29, 2020                                                               | Daily PM <sub>2.5</sub> , PM <sub>10</sub> , SO <sub>2</sub> , CO, NO <sub>2</sub> , and O <sub>3</sub> concentrations: January 25, 2020 – February 29, 2020, average of hourly concentrations from state-controlled monitors aggregated to the city level (air quality index [AQI] platform website) | Multivariate Poisson regression                                                     | Of the 6 pollutants, only PM <sub>2.5</sub> (with no lag) had a strong positive association with COVID-19 cases in all three cities (Wuhan: RR=1.036, 95% CI: 1.032, 1.039; XiaoGan: RR=1.059, 95% CI: 1.046, 1.072; and HuangGang: RR=1.144, 95% CI: 1.12, 1.169)                                                                                                                                                                                                                       | <ul style="list-style-type: none"> <li>PM<sub>10</sub> was significantly negatively associated with COVID-19 cases in all three</li> <li>SO<sub>2</sub> was not significantly associated with COVID-19 cases in Wuhan</li> <li>CO was negatively associated with COVID-19 cases in XiaoGan and HuangGang</li> <li>NO<sub>2</sub> was not significantly associated with COVID-19 cases in HuangGang</li> <li>O<sub>3</sub> was negatively associated with COVID-19 in Wuhan and XiaoGan</li> </ul> | Temperature, relative humidity, wind speed                    | No                       |
| Possible environmental effects on the spread of COVID-19 in China ( <i>Science of the Total Environment</i> )                              | Xu et al., 2020    | China: 33 cities                    | What is the relationship between short-term exposure to poor (Air Quality Index) AQI and COVID-19 cases?                                                                        | COVID-19 cases: January 29, 2020 – February 15, 2020                                                               | Daily AQI: January 29, 2020 – February 15, 2020, average of hourly values from monitoring stations aggregated to the city level (Ministry of Ecology and Environment of People's Republic of China)                                                                                                   | Multivariate Poisson regression                                                     | The effect of AQI on COVID-19 confirmed cases was positively associated with cumulative one day lag (RR=1.0009, 95% CI: 1.0004, 1.0013), two day lag (RR=1.0007, 95% CI: 1.0003, 1.0012), and three day lag (RR=1.0008, 95% CI: 1.0003, 1.0012)                                                                                                                                                                                                                                          | <ul style="list-style-type: none"> <li>The effect of AQI on COVID-19 confirmed cases was negatively associated with cumulative zero day lag and cumulative seven day lag.</li> <li>The effect of AQI on COVID-19 confirmed cases was not statistically significant for cumulative four, five, and six day lag.</li> </ul>                                                                                                                                                                         | Temperature, relative humidity                                | No                       |
| An effect assessment of airborne particulate matter pollution on COVID-19: a multicity study in China (medRxiv)                            | Wang et al., 2020  | China: 72 cities                    | What is the relationship between short-term exposure to PM <sub>2.5</sub> and PM <sub>10</sub> and COVID-19 cases?                                                              | COVID-19 cases: January 20, 2020 – March 2, 2020                                                                   | Daily PM <sub>2.5</sub> and PM <sub>10</sub> concentrations: January 20, 2020 – March 2, 2020, at the city level (R package "nCov2019" - Wu et al., 2020)                                                                                                                                             | Generalized additive models (GAM) with quasi-Poisson distribution for each city and | <ul style="list-style-type: none"> <li>PM<sub>2.5</sub> and PM<sub>10</sub> were significantly positively associated with daily COVID-19 confirmed cases for all cumulative lag periods (1-7 days and 14 days)</li> <li>The estimated RRs for a 14-day cumulative lag period was strongest at day 14:</li> </ul>                                                                                                                                                                         | PM <sub>10</sub> single-day lag 5, lag 6 and lag 7, and PM <sub>2.5</sub> single-day lag 5, lag 6 had non-significant associations with COVID-19 confirmed cases                                                                                                                                                                                                                                                                                                                                  | Ambient temperature, absolute humidity, migration scale index | No                       |

|                                                                                                                                                             |                     |                              |                                                                                                                                                                                 |                                                                                   |                                                                                                                                                                                                   |                                                                      |                                                                                                                                                                                                                                                                                                                                                                                                                                                                                                                                                                                                                                                                                                                                                                                                                                                                                                                                                                                                                                                           |                                                                                                                                                                                                                                                                                                                                                         |                                                                                                 |    |
|-------------------------------------------------------------------------------------------------------------------------------------------------------------|---------------------|------------------------------|---------------------------------------------------------------------------------------------------------------------------------------------------------------------------------|-----------------------------------------------------------------------------------|---------------------------------------------------------------------------------------------------------------------------------------------------------------------------------------------------|----------------------------------------------------------------------|-----------------------------------------------------------------------------------------------------------------------------------------------------------------------------------------------------------------------------------------------------------------------------------------------------------------------------------------------------------------------------------------------------------------------------------------------------------------------------------------------------------------------------------------------------------------------------------------------------------------------------------------------------------------------------------------------------------------------------------------------------------------------------------------------------------------------------------------------------------------------------------------------------------------------------------------------------------------------------------------------------------------------------------------------------------|---------------------------------------------------------------------------------------------------------------------------------------------------------------------------------------------------------------------------------------------------------------------------------------------------------------------------------------------------------|-------------------------------------------------------------------------------------------------|----|
|                                                                                                                                                             |                     |                              |                                                                                                                                                                                 |                                                                                   |                                                                                                                                                                                                   | meta analyses to aggregate results from each city                    | 1.64 (95% CI: 1.47, 1.82) and 1.47 (95% CI: 1.34, 1.61), with each 10 µg/m <sup>3</sup> increase in PM <sub>2.5</sub> and PM <sub>10</sub> concentrations, respectively                                                                                                                                                                                                                                                                                                                                                                                                                                                                                                                                                                                                                                                                                                                                                                                                                                                                                   |                                                                                                                                                                                                                                                                                                                                                         |                                                                                                 |    |
| Air pollution and temperature are associated with increased COVID-19 incidence: a time series study ( <i>International Journal of Infectious Diseases</i> ) | Li et al., 2020     | China: Wuhan and XiaoGan     | What is the relationship between short-term exposure to CO, PM <sub>2.5</sub> , PM <sub>10</sub> , NO <sub>2</sub> , and Air Quality Index (AQI) and COVID-19 cases and deaths? | COVID-19 cases: January 26, 2020 – February 29, 2020                              | Daily AQI, PM <sub>2.5</sub> , PM <sub>10</sub> , NO <sub>2</sub> , and CO: January 26, 2020 – February 29, 2020, at the city level (Platform AQI)                                                | Univariate linear regression                                         | <ul style="list-style-type: none"> <li>PM<sub>2.5</sub> and PM<sub>10</sub> was significantly positively associated with daily COVID-19 confirmed cases for 1-4, 7, and 14 and 1-4 and 14 single-day lag periods respectively</li> <li>The estimated RRs was strongest at 3 single-day lag periods, with corresponding RRs of 1.08 (95% CI: 1.01, 1.11) and 1.11 (95% CI: 1.08, 1.14), respectively</li> <li>A significant correlation was found between AQI and COVID-19 cases in both Wuhan (R<sup>2</sup>=0.13, p&lt;0.05) and XiaoGan (R<sup>2</sup>=0.223, p&lt;0.01) for 4 lag days.</li> <li>In Wuhan, NO<sub>2</sub> (R<sup>2</sup>=0.329, p&lt;0.01), PM<sub>2.5</sub> (R<sup>2</sup>=0.174, p&lt;0.05), and CO (R<sup>2</sup>=0.203, p&lt;0.001) were significantly correlated with COVID-19 cases</li> <li>In XiaoGan, PM<sub>2.5</sub> (R<sup>2</sup>=0.23, p&lt;0.01) NO<sub>2</sub> (R<sup>2</sup>=0.158, p&lt;0.05), and PM<sub>10</sub> (R<sup>2</sup> = 0.158, p &lt; 0.05) were significantly correlated with COVID-19 cases</li> </ul> | <ul style="list-style-type: none"> <li>In Wuhan, PM<sub>10</sub> had a non-significant correlation with COVID-19 cases (R<sup>2</sup>=0.105, p&gt;0.05)</li> <li>In XiaoGan, CO had a non-significant correlation with COVID-19 cases (R<sup>2</sup>=0.022, p&gt;0.05)</li> </ul>                                                                       | None                                                                                            | No |
| Outdoor air pollutant concentration and COVID-19 infection in Wuhan, China (medRxiv)                                                                        | Han et al., 2020    | China: Wuhan                 | What is the relationship between short-term exposure to PM <sub>2.5</sub> and COVID-19 cases?                                                                                   | COVID-19 cases: January 1, 2020 – March 20, 2020                                  | Daily PM <sub>2.5</sub> concentration: January 1, 2020 – March 20, 2020, at the city level (Chinese National Environmental Monitoring Center)                                                     | Multiple linear regression                                           | PM <sub>2.5</sub> was most significantly associated with COVID-19 cases (coeff=0.146, p=0.031) with an 8-day time lag                                                                                                                                                                                                                                                                                                                                                                                                                                                                                                                                                                                                                                                                                                                                                                                                                                                                                                                                     | N/A                                                                                                                                                                                                                                                                                                                                                     | Lockdown policy (binary), mobility, temperature, dew point, UV index, precipitation, wind speed | No |
| Correlation between climate indicators and COVID-19 pandemic in New York, USA ( <i>Science of the Total Environment</i> )                                   | Bashir et al., 2020 | United States: New York City | What is the relationship between short-term exposure to poor Air Quality Index (AQI) and COVID-19 cases?                                                                        | COVID-19 new cases, cumulative cases, and deaths: March 12, 2020 – April 12, 2020 | Daily "Air Quality" metric found in the National Weather Service dataset: March 1, 2020 – April 12, 2020 in New York City                                                                         | Kendall correlation coefficient and Spearman correlation coefficient | Air quality was significantly associated with COVID-19 new cases, cumulative cases, and mortality with no lag at a less than 1% significance level (Kendall tau: -0.537<tau<-0.531, p<0.001; Spearman: -0.684<r<-0.659, p<0.001)                                                                                                                                                                                                                                                                                                                                                                                                                                                                                                                                                                                                                                                                                                                                                                                                                          | N/A                                                                                                                                                                                                                                                                                                                                                     | None                                                                                            | No |
| Association between short-term exposure to air pollution and COVID-19 infection: evidence from China ( <i>Science of the Total Environment</i> )            | Zhu et al., 2020    | China: 120 cities            | What is the relationship between short-term exposure to PM <sub>2.5</sub> , PM <sub>10</sub> , SO <sub>2</sub> , CO, NO <sub>2</sub> , and O <sub>3</sub> and COVID-19 cases?   | COVID-19 cases: January 23, 2020 – February 29, 2020                              | Daily PM <sub>2.5</sub> , PM <sub>10</sub> , SO <sub>2</sub> , CO, NO <sub>2</sub> , and O <sub>3</sub> concentrations: January 23, 2020 – February 29, 2020, at the city level (AQI Study China) | GAM with a Gaussian distribution                                     | "A 10 µg/m <sup>3</sup> increase (lag 0-14) in PM <sub>2.5</sub> , PM <sub>10</sub> , NO <sub>2</sub> , O <sub>3</sub> , and 1 mg/m <sup>3</sup> increase in CO (lag 0-21) was associated with a 2.24% (95% CI: 1.02 to 3.46), 1.76% (95% CI: 0.89 to 2.63), 6.94% (95% CI: 2.38 to 11.51), 4.76% (95% CI: 1.99 to 7.52) and 15.11% (95% CI: 0.44 to 29.77) increase in COVID-19 cases"                                                                                                                                                                                                                                                                                                                                                                                                                                                                                                                                                                                                                                                                   | Insignificant associations were found between PM <sub>2.5</sub> , PM <sub>10</sub> , CO, NO <sub>2</sub> (lag 0-7), CO (lag 0-14), SO <sub>2</sub> , and O <sub>3</sub> (lag 0-21) and COVID-19 cases: "A 10 µg/m <sup>3</sup> increase (lag 0-14) in SO <sub>2</sub> was associated with a 7.79% (95% CI: -14.57 to -1.01) decrease in COVID-19 cases" | Temperature, relative humidity, air pressure, wind speed                                        | No |



**Table 3. Short-term Cross-sectional Studies Included in this Scoping Review**

| Title (Source)                                                                                                                             | Author                | Geographical Area of Study                                                   | Research Question                                                                                                                                          | Outcome                                                                           | Exposure                                                                                                                                                                                                                                                                                    | Method of Data Analysis      | Significant Positive Results                                                                                                                                                                                                                                                                                                                                                                                  | Non-Significant Results and Significant Negative Results                                                                                                                                                                                                                                                                                                                                                                                                              | Covariates or Possible Confounders                                                                                                     | Code Availability (link)                                          |
|--------------------------------------------------------------------------------------------------------------------------------------------|-----------------------|------------------------------------------------------------------------------|------------------------------------------------------------------------------------------------------------------------------------------------------------|-----------------------------------------------------------------------------------|---------------------------------------------------------------------------------------------------------------------------------------------------------------------------------------------------------------------------------------------------------------------------------------------|------------------------------|---------------------------------------------------------------------------------------------------------------------------------------------------------------------------------------------------------------------------------------------------------------------------------------------------------------------------------------------------------------------------------------------------------------|-----------------------------------------------------------------------------------------------------------------------------------------------------------------------------------------------------------------------------------------------------------------------------------------------------------------------------------------------------------------------------------------------------------------------------------------------------------------------|----------------------------------------------------------------------------------------------------------------------------------------|-------------------------------------------------------------------|
| Ambient air pollutants, meteorological factors and their interactions affect confirmed cases of COVID-19 in 120 Chinese cities (medRxiv)   | Zhou et al., 2020     | China: 120 cities                                                            | What is the relationship between short-term exposure to PM <sub>2.5</sub> , NO <sub>2</sub> , SO <sub>2</sub> , CO, and O <sub>3</sub> and COVID-19 cases? | COVID-19 cases: January 15, 2020 – March 18, 2020                                 | Mean PM <sub>2.5</sub> , NO <sub>2</sub> , SO <sub>2</sub> , CO, and O <sub>3</sub> concentrations: January 15, 2020 – March 15, 2020, calculated from daily concentrations at the city level (Harvard Dataverse)                                                                           | Negative binomial regression | <ul style="list-style-type: none"> <li>CO and PM<sub>2.5</sub> were significantly positively associated with COVID-19 confirmed cases for 0, 3, 7, and 14 lag days (0.000&lt;p&lt;0.045)</li> <li>O<sub>3</sub> was significantly positively associated with COVID-19 confirmed cases for 0 lag days (p=0.045)</li> </ul>                                                                                     | <ul style="list-style-type: none"> <li>NO<sub>2</sub> was not significantly associated with COVID-19 confirmed cases for 0, 3, 7, 14 lag days (0.320 &lt; p &lt; 0.402)</li> <li>O<sub>3</sub> was not significantly associated with COVID-19 confirmed cases for 3, 7, and 14 lag days (0.06 &lt; p &lt; 0.180)</li> <li>SO<sub>2</sub> was significantly negatively associated with COVID-19 confirmed cases for 0, 3, 7, and 14 lag days (p &lt; 0.001)</li> </ul> | Average temperature range, diurnal temperature range, relative humidity, wind velocity, air pressure, precipitation, hours of sunshine | No                                                                |
| Associations between ambient air pollutants exposure and case fatality rate of COVID-19: a multi-city ecological study in China (medRxiv)  | Zhang et al., 2020a   | China: 24 provinces and 13 main cities in Hubei Province                     | What is the relationship between short-term exposure to PM <sub>2.5</sub> , PM <sub>10</sub> , and NO <sub>2</sub> and COVID-19 case fatality rate?        | COVID-19 case fatality rate: January 22, 2020 – March 5, 2020                     | Cumulative PM <sub>2.5</sub> , PM <sub>10</sub> , an NO <sub>2</sub> concentrations: December 25, 2019 – March 5, 2020, extracted from daily concentrations at air quality monitors aggregated to the provincial and city level (National Air Quality Real-time Publishing System of China) | Multiple linear regression   | <ul style="list-style-type: none"> <li>At the province level, PM<sub>2.5</sub>, PM<sub>10</sub>, and NO<sub>2</sub> were significantly correlated with COVID-19 case fatality rate for 14-day and 28-day lag periods (0.62&lt;r&lt;0.73; 0.000&lt;p&lt;0.002)</li> <li>At the city level in Hubei, NO<sub>2</sub> was significantly correlated with COVID-19 case fatality rate (r=0.697, p=0.008)</li> </ul> | At the city level in Hubei, PM <sub>2.5</sub> and PM <sub>10</sub> were not significantly associated with COVID-19 case fatality rate (0.032 < r < 0.185; 0.513 < p < 0.917)                                                                                                                                                                                                                                                                                          | None                                                                                                                                   | No                                                                |
| Ambient nitrogen dioxide pollution and spread ability of COVID-19 in Chinese cities (medRxiv)                                              | Yao et al., 2020a     | China: 63 cities                                                             | What is the relationship between short-term exposure to NO <sub>2</sub> and the spreadability of COVID-19?                                                 | Basic reproduction number (R0) using case data up to February 26, 2020            | Mean daily NO <sub>2</sub> concentrations: January 27, 2020 – February 26, 2020, calculated as an average of at least 18 hourly concentrations from state-controlled monitoring stations aggregated to the city level (National Urban Air Quality Publishing Platform)                      | Multiple linear regression   | NO <sub>2</sub> was positively associated with R0 in all cities (χ <sup>2</sup> =10.18, p=0.037)                                                                                                                                                                                                                                                                                                              | N/A                                                                                                                                                                                                                                                                                                                                                                                                                                                                   | Temperature and humidity                                                                                                               | No                                                                |
| Severe air pollution links to higher mortality in COVID-19 patients: the "double-hit" hypothesis ( <i>Journal of Infectious Diseases</i> ) | Frontera et al., 2020 | Italy: 21 regions                                                            | What is the relationship between short-term exposure to PM <sub>2.5</sub> and COVID-19 health outcomes?                                                    | COVID-19 cases, hospitalizations, ICU admissions, and deaths up to March 31, 2020 | Mean PM <sub>2.5</sub> concentrations in February 2020, calculated from daily levels from measurement stations aggregated to the regional level (Air-Matters App and Website)                                                                                                               | Univariate linear regression | PM <sub>2.5</sub> was significantly associated with COVID-19 cases (r=0.64, p=0.0074), ICU admissions per day (r=0.65, p=0.0051), deaths (r=0.53, p=0.032), and hospitalized cases (r=0.62, p=0.0089)                                                                                                                                                                                                         | N/A                                                                                                                                                                                                                                                                                                                                                                                                                                                                   | None                                                                                                                                   | No                                                                |
| Spatial correlation of particulate matter pollution and death rate of COVID-19 (medRxiv)                                                   | Yao et al., 2020c     | China: 49 cities                                                             | What is the relationship between short-term exposure to PM <sub>2.5</sub> and PM <sub>10</sub> and COVID-19 deaths?                                        | COVID-19 death rate (deaths/confirmed cases) up to March 22, 2020                 | Mean daily PM <sub>2.5</sub> and PM <sub>10</sub> concentrations in March 2020 at the city level (National Urban Air Quality Publishing Platform)                                                                                                                                           | Multiple linear regression   | PM <sub>2.5</sub> was positively associated with COVID-19 death rate (χ <sup>2</sup> =13.10, p=0.011) and PM <sub>10</sub> (χ <sup>2</sup> =12.38, p=0.015)                                                                                                                                                                                                                                                   | N/A                                                                                                                                                                                                                                                                                                                                                                                                                                                                   | Temperature, relative humidity, gross domestic product per capita, hospital beds per capita                                            | No                                                                |
| Spatial-temporal variations in atmospheric                                                                                                 | Fronza et al., 2020   | <ul style="list-style-type: none"> <li>France, Germany, Spain: 47</li> </ul> | What is the relationship between short-                                                                                                                    | Total COVID-19 cases and a binary variable for epidemic escalation:               | Mean daily and mean daily maximum concentrations for PM <sub>2.5</sub> , PM <sub>10</sub> , NH <sub>3</sub> , and O <sub>3</sub> : February 10, 2020 – April 10,                                                                                                                            | Spearman correlation and an  | <ul style="list-style-type: none"> <li>PM<sub>2.5</sub>, PM<sub>10</sub>, and NH<sub>3</sub> showed a significant positive correlation with COVID-19</li> </ul>                                                                                                                                                                                                                                               | O <sub>3</sub> had a significantly negatively correlated with COVID-19 cases per million                                                                                                                                                                                                                                                                                                                                                                              | Temperature, dew point temperature, wind speed, surface pressure                                                                       | Yes ( <a href="https://github.com/CO">https://github.com/CO</a> ) |

|                                                                                                                                             |                                                                           |                                                                                                                                                                                                                                                                                                                                                                          |                                                                                               |                                                                                                                                                           |                                                                                                                                                                                                                                                               |                                                                                                                                                                                                     |                                                                                                                                                                                                                                                                                                                                                                          |     |                                                                                      |    |
|---------------------------------------------------------------------------------------------------------------------------------------------|---------------------------------------------------------------------------|--------------------------------------------------------------------------------------------------------------------------------------------------------------------------------------------------------------------------------------------------------------------------------------------------------------------------------------------------------------------------|-----------------------------------------------------------------------------------------------|-----------------------------------------------------------------------------------------------------------------------------------------------------------|---------------------------------------------------------------------------------------------------------------------------------------------------------------------------------------------------------------------------------------------------------------|-----------------------------------------------------------------------------------------------------------------------------------------------------------------------------------------------------|--------------------------------------------------------------------------------------------------------------------------------------------------------------------------------------------------------------------------------------------------------------------------------------------------------------------------------------------------------------------------|-----|--------------------------------------------------------------------------------------|----|
| factors contribute to SARS-CoV-2 outbreak ( <i>Viruses</i> )                                                                                | regional capitals                                                         | term exposure to PM <sub>2.5</sub> , PM <sub>10</sub> , NH <sub>3</sub> , and O <sub>3</sub> and COVID-19 cases?                                                                                                                                                                                                                                                         | March 25, 2020 – April 10, 2020                                                               | 2020, calculated by aggregating hourly concentrations at the city level                                                                                   | Artificial Neural Network (ANN) to predict epidemic escalation                                                                                                                                                                                                | cases per million persons (0.58<r<0.68)                                                                                                                                                             | persons (-0.5 < r < -0.44)                                                                                                                                                                                                                                                                                                                                               |     | VID19Upcome/Europe)                                                                  |    |
|                                                                                                                                             | <ul style="list-style-type: none"> <li>Italy: 107 major cities</li> </ul> |                                                                                                                                                                                                                                                                                                                                                                          |                                                                                               |                                                                                                                                                           |                                                                                                                                                                                                                                                               | <ul style="list-style-type: none"> <li>The ANN classifier predicting epidemic escalation with both PM<sub>2.5</sub> and O<sub>3</sub> was significant with respect to the null predictor</li> </ul> |                                                                                                                                                                                                                                                                                                                                                                          |     |                                                                                      |    |
| COVID-19 pandemic in relation to levels of pollution with PM <sub>2.5</sub> and ambient salinity. an environmental Wake-up Call (medRxiv)   | Baron et al., 2020                                                        | <ul style="list-style-type: none"> <li>7 cities with high numbers of COVID-19 cases, including Wuhan, Qom,</li> <li>Bergamo, Paris, Madrid, London and New York</li> <li>8 coastal or small island cities with low numbers of COVID-19 cases, including Seoul, Napoli, Brest, Eastbourne, Taipei, Hong Kong</li> <li>Small countries such as Malta and Cyprus</li> </ul> | What is the relationship between short-term exposure to PM <sub>2.5</sub> and COVID-19 cases? | Difference in PM <sub>2.5</sub> concentrations for two groups of cities, delineated by low or high number of COVID-19 cases in an unspecified time period | Minimum and maximum PM <sub>2.5</sub> levels 1 month before and 1 month after statutory lockdown or mandatory restrictions at the city and country level (China National Environmental Monitoring Centre)                                                     | Unspecified                                                                                                                                                                                         | "One month prior to the statutory national lock-down or mandatory restrictions, there appear to be high levels of particulate matter, PM <sub>2.5</sub> (min-max 67.4 - 118.7 AQI), in cities/countries which had a high incidence of Covid-19 infection compared to lower levels in cities/countries that have contained the infection (min-max 45.6 - 79.8) (p<0.046)" | N/A | None                                                                                 | No |
| The potential role of particulate matter in the spreading of COVID-19 in northern Italy: first evidence-based research hypotheses (medRxiv) | Setti et al., 2020                                                        | Italy: 110 provinces                                                                                                                                                                                                                                                                                                                                                     | What is the relationship between short-term exposure to PM <sub>10</sub> and COVID-19 cases?  | COVID-19 cases: February 24, 2020 – March 13, 2020                                                                                                        | Daily PM <sub>10</sub> concentrations exceeding legal limit of 50 µg/m <sup>3</sup> : February 9, 2020 – February 29, 2020, extracted from official air quality monitoring stations aggregated to province level (Regional Environmental Protection Agencies) | Multivariate binomial regression                                                                                                                                                                    | Daily PM <sub>10</sub> limit exceedances (with a 17 day lag) were significantly associated with COVID-19 cases (coeff=0.25, p<0.001)                                                                                                                                                                                                                                     | N/A | Population density, number of people traveling daily, proportion of people traveling | No |

## Figure captions

**Figure 1.** PRISMA figure displaying the screening process for the 825 studies identified in the database searches run on June 9, 2020. In the first round, duplicate studies were removed. In the second round, studies deemed irrelevant by title and abstract review were removed. Finally, studies deemed irrelevant by full-text review were removed, resulting in a total of 28 studies included in the review.

**Figure 2.** Results stratified by the type of air pollutant. **Orange** represents the number of studies that reported a statistically significant positive association between the air pollutant and COVID-19 outcomes. **Blue** and **Orange** together represent the total number of studies. (a) Long-term studies. (b) Short-term studies.

## Figures

Figure 1

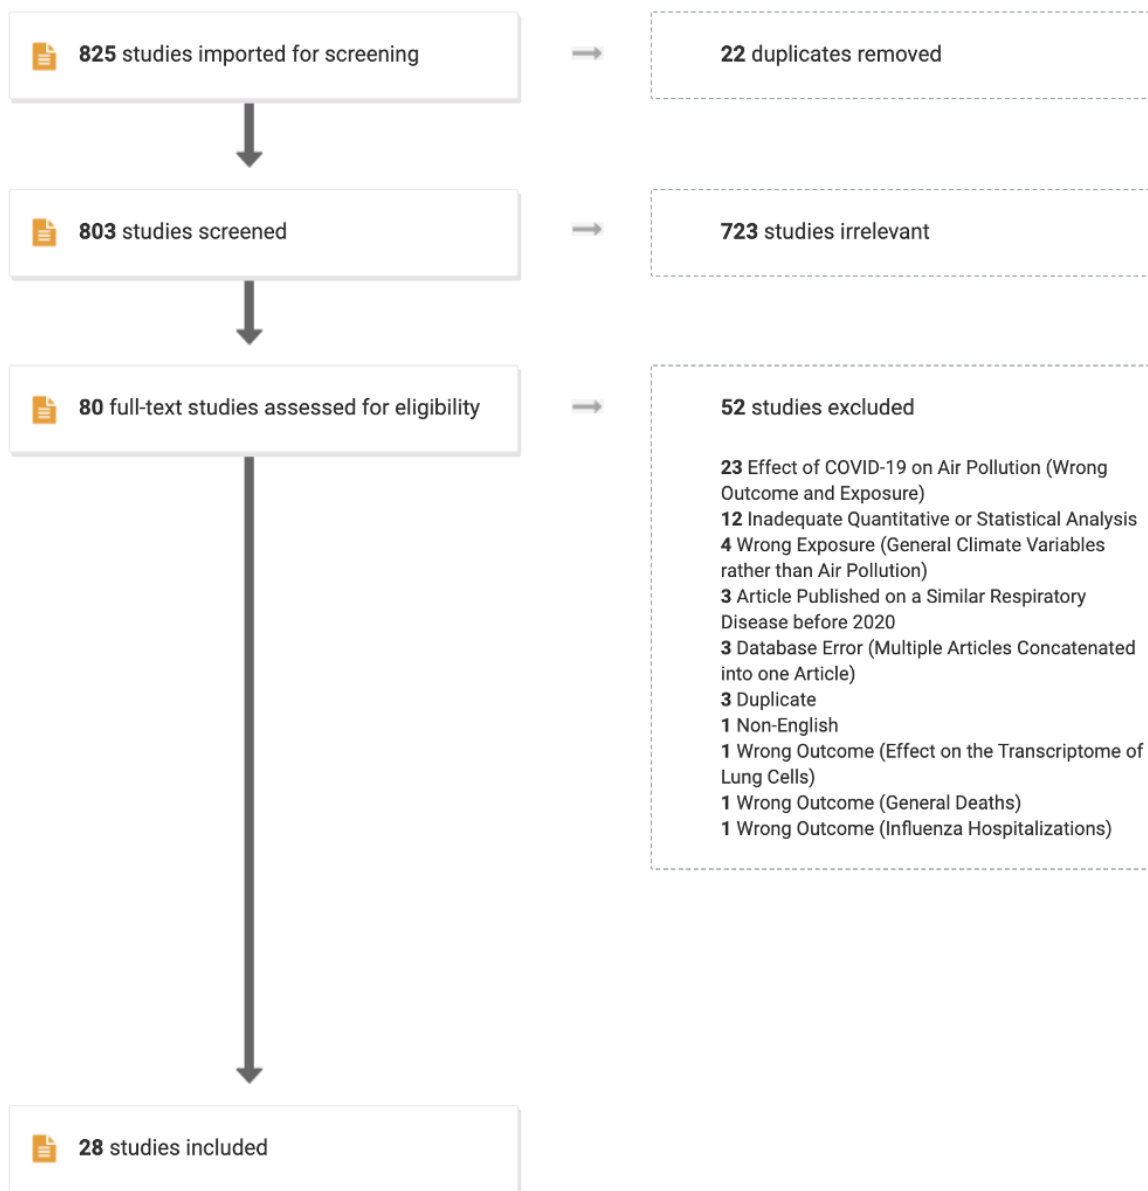

**Figure 2**

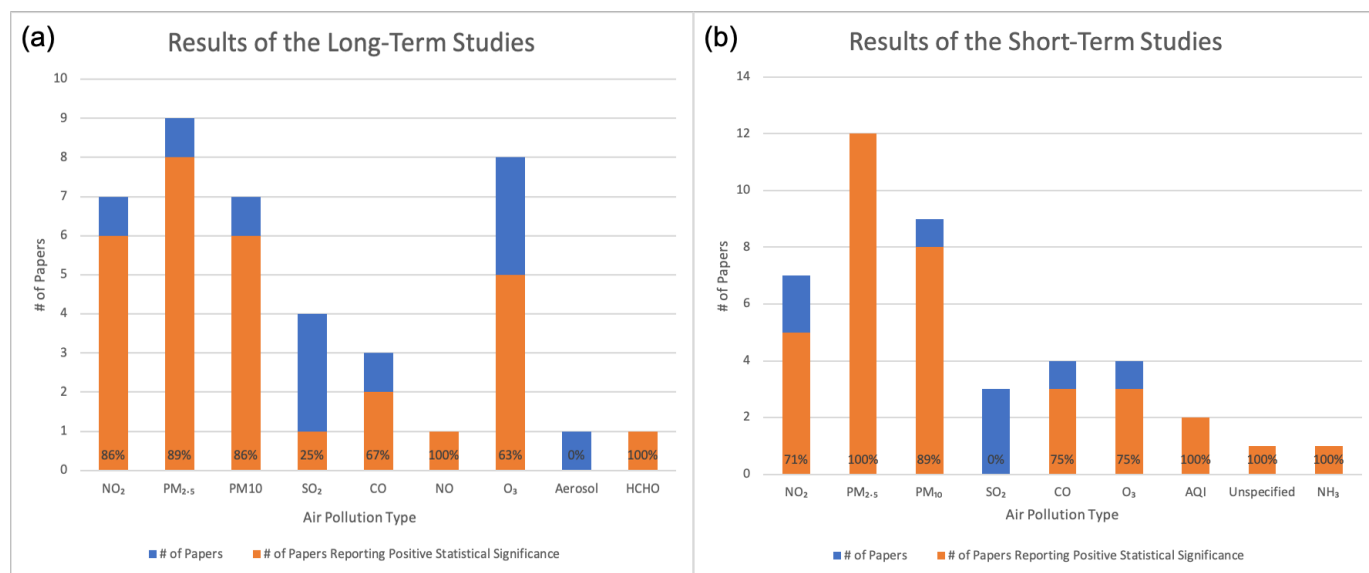

## Supplemental Materials

**Supplemental Table 1.** Search Queries for All Relevant Databases (as of June 9, 2020)

| DATABASE      | Strategy                                                                                                                                                                                                                                                                                                                                                                                                                                                                                                                                                                                                                                                                                                                                                                                                                                                                                                     | Result<br><br>(before<br>duplicate<br>removal) |
|---------------|--------------------------------------------------------------------------------------------------------------------------------------------------------------------------------------------------------------------------------------------------------------------------------------------------------------------------------------------------------------------------------------------------------------------------------------------------------------------------------------------------------------------------------------------------------------------------------------------------------------------------------------------------------------------------------------------------------------------------------------------------------------------------------------------------------------------------------------------------------------------------------------------------------------|------------------------------------------------|
| <b>PUBMED</b> | (novel coronavirus[tiab] OR 2019-ncov[tiab] OR coronavirus[tiab] OR coronavirus disease-9[tiab] OR coronavirus*[tiab] OR coronovirus*[tiab] OR 2019-nCoV[tiab] OR COVID-19[tiab] OR Covid[tiab] OR ncov[tiab] OR SARS-CoV-2[tiab] OR SARSCov19[tiab] OR SARS-Covid[tiab] OR "Coronavirus Infections"[Mesh] OR "Coronavirus"[Mesh]) AND (((pollut*[ti] OR qualit*[ti]) AND air[ti]) AND (air pollution[tiab] OR PM 2.5[tiab] OR PM5[tiab] OR PM10[tiab] OR Air pollutant*[tiab] OR particle*[tiab] OR particulate*[tiab] OR "Air Pollution"[Mesh] OR air quality[tiab] OR (air[ti] AND (quality*[ti] OR pollut*[ti]))) OR air-quality[tiab] OR smog[tiab] OR soot[tiab] or gases[tiab] OR wood smoke[tiab] OR ozone[tiab] OR hydrocarbon*[tiab] OR polyaromatic hydrocarbon*[tiab] OR PAH[tiab] OR greenhouse gas*[tiab] OR carbon dioxide[tiab] OR methane[tiab] OR hydrofluorocarbon*[tiab] OR HFC[tiab] OR | 41                                             |

volatile organic compound\*[tiab] OR VOC[tiab] OR CO2[tiab] OR  
combustion[tiab] OR emission\*[tiab] OR Nitrogen oxide\*[tiab]  
OR NOx[tiab] OR NO2[tiab] OR Sulphur dioxide[tiab] OR  
SO2[tiab] OR O3[tiab]))

| EMBASE | Embase Session Results (9 Jun 2020)                                                                                                                                                                                                                                                                                                                                                                                                                                                                                                                                                                                                                                                                                                                                                                                                                                                                                                                     | 41      |
|--------|---------------------------------------------------------------------------------------------------------------------------------------------------------------------------------------------------------------------------------------------------------------------------------------------------------------------------------------------------------------------------------------------------------------------------------------------------------------------------------------------------------------------------------------------------------------------------------------------------------------------------------------------------------------------------------------------------------------------------------------------------------------------------------------------------------------------------------------------------------------------------------------------------------------------------------------------------------|---------|
| No.    | Query                                                                                                                                                                                                                                                                                                                                                                                                                                                                                                                                                                                                                                                                                                                                                                                                                                                                                                                                                   | Results |
| #3     | #1 AND #2                                                                                                                                                                                                                                                                                                                                                                                                                                                                                                                                                                                                                                                                                                                                                                                                                                                                                                                                               | 41      |
| #2     | (pollut*:ti OR qualit*:ti) AND air:ti AND ('air<br>pollution'/exp OR 'pollution and pollution related<br>phenomena'/exp OR 'particulate matter'/exp OR<br>'particulate matter 2 5'/exp OR 'particulate<br>matter 10'/exp OR 'airborne particle'/exp OR 'air<br>quality'/exp OR 'wood smoke'/exp OR 'air<br>pollutant'/exp OR 'air pollution':ab,ti OR 'pm<br>2.5':ab,ti OR pm5:ab,ti OR pm10:ab,ti OR 'air<br>pollutant*':ab,ti OR particle*:ab,ti OR<br>particulate*:ab,ti OR (air:ti AND (quality*:ti OR<br>pollut*:ti)) OR 'air quality':ab,ti OR smog:ab,ti OR<br>soot:ab,ti OR gases:ab,ti OR 'wood smoke':ab,ti<br>OR ozone:ab,ti OR hydrocarbon*:ab,ti OR<br>'polyaromatic hydrocarbon*':ab,ti OR pah:ab,ti<br>OR 'greenhouse gas*':ab,ti OR 'carbon<br>dioxide':ab,ti OR methane:ab,ti OR<br>hydrofluorocarbon*:ab,ti OR hfc:ab,ti OR 'volatile<br>organic compound*':ab,ti OR voc:ab,ti OR<br>co2:ab,ti OR combustion:ab,ti OR emission*:ab,ti | 25718   |



OR 'nitrogen oxide\*':ab,ti OR nox:ab,ti OR  
no2:ab,ti OR 'sulphur dioxide':ab,ti OR so2:ab,ti  
OR o3:ab,ti)

**#1** 'novel coronavirus':ab,ti OR '2019 ncov':ab,ti OR **43507**  
coronavirus:ab,ti OR 'coronavirus disease-9':ab,ti  
OR coronavirus\*:ab,ti OR coronovirus\*:ab,ti OR  
'2019-ncov':ab,ti OR 'covid 19':ab,ti OR covid:ab,ti  
OR ncov:ab,ti OR 'sars cov 2':ab,ti OR  
sarscov19:ab,ti OR 'sars-covid':ab,ti OR 'covid  
19'/exp OR 'coronaviridae'/exp OR 'coronaviridae  
infection'/exp OR 'coronavirus disease 2019'/exp

|                           |                                                                       |
|---------------------------|-----------------------------------------------------------------------|
| <b>WEB OF SCIENCE</b>     | <b>TOPIC:</b> (“novel coronavirus” OR 2019-ncov OR coronavirus OR 201 |
|                           | “coronavirus disease-9” OR coronavirus* OR coronavirus* OR            |
| <b>TIMESPAN: ALL</b>      | “2019-nCoV” OR COVID-19 OR Covid OR ncov OR SARS-CoV-2                |
| <b>YEARS.</b>             | OR SARSCov19 OR “SARS-Covid” OR “covid 19” OR                         |
| <b>DATABASES: WOS,</b>    | “Coronaviridae” OR “Coronaviridae infection” OR “coronavirus          |
| <b>BCI, BIOSIS, CABI,</b> | disease 2019”) AND <b>TOPIC:</b> (((pollut* OR qualit*) AND air)      |
| <b>CCC, DRCI, DIIDW,</b>  | AND (“air pollution” OR “pollution and pollution related              |
| <b>KJD, MEDLINE,</b>      | phenomena” OR “particulate matter” OR “particulate matter 2           |
| <b>RSCI, SCIELO,</b>      | 5” OR “particulate matter 10” OR “airborne particle” OR “air          |
| <b>ZOOREC.</b>            | quality” OR “wood smoke” OR “air pollutant” OR “air                   |
|                           | pollution” OR “PM 2.5” OR PM5 OR PM10 OR “Air pollutant*”             |
|                           | OR particle* OR particulate* OR “air quality” OR (air AND             |
|                           | (quality* OR pollut*)) OR air-quality OR smog OR soot OR              |
|                           | gases OR “wood smoke” OR ozone OR hydrocarbon* OR                     |
|                           | “polyaromatic hydrocarbon*” OR PAH OR “greenhouse gas*”               |
|                           | OR “carbon dioxide” OR methane OR hydrofluorocarbon* OR               |
|                           | HFC OR “volatile organic compound*” OR VOC OR CO2 OR                  |
|                           | combustion OR emission* OR “Nitrogen oxide*” OR NOx OR                |
|                           | NO2 OR “Sulphur dioxide” OR SO2 OR O3)))                              |

|                                         |                                                                                                                                   |     |
|-----------------------------------------|-----------------------------------------------------------------------------------------------------------------------------------|-----|
| <b>COCHRANE COVID-19 STUDY REGISTER</b> | Filtered by: pollution OR pollutant OR pollutants OR particulate OR particulates OR air quality OR PM5 OR PM10 OR volatile OR VOC | 458 |
| <b>BIORXIV AND MEDRXIV</b>              | "air pollut* AND (covid OR Covid-19 OR coronavirus OR SARS-CoV-2)"                                                                | 165 |
| <b>165 BIORXIV 20 MEDRXIV- 145</b>      |                                                                                                                                   |     |
